1 **Mechanical impact on the head has an antihypertensive effect**

2

3 **Authors:**

4 **Shuhei Murase<sup>1,2,14</sup>, Naoyoshi Sakitani<sup>1,14</sup>, Takahiro Maekawa<sup>1</sup>, Daisuke Yoshino<sup>3</sup>, Ayumu**  
5 **Konno<sup>4</sup>, Hirokazu Hirai<sup>4</sup>, Taku Saito<sup>2</sup>, Sakae Tanaka<sup>2</sup>, Keisuke Shinohara<sup>5</sup>, Takuya Kishi<sup>6</sup>,**  
6 **Yuki Yoshikawa<sup>7</sup>, Takamasa Sakai<sup>7</sup>, Makoto Ayaori<sup>8</sup>, Hirohiko Inanami<sup>9</sup>, Koji Tomiyasu<sup>10</sup>,**  
7 **Toru Ogata<sup>1,11</sup>, Atsushi Takashima<sup>12</sup>, Masahiro Shinohara<sup>1</sup>, Motoshi Nagao<sup>1</sup> and Yasuhiro**  
8 **Sawada<sup>1,13\*</sup>**

9

10 **Affiliations:**

11 <sup>1</sup>Department of Rehabilitation for Motor Functions, National Rehabilitation Center for Persons with  
12 Disabilities, Tokorozawa, Japan. <sup>2</sup>Department of Orthopaedic Surgery, Graduate School of  
13 Medicine, The University of Tokyo, Tokyo, Japan. <sup>3</sup>Division of Advanced Applied  
14 Physics, Institute of Engineering, Tokyo University of Agriculture and Technology, Koganei, Japan.  
15 <sup>4</sup>Department of Neurophysiology & Neural Repair, Gunma University Graduate School of  
16 Medicine, Maebashi, Japan. <sup>5</sup>Department of Cardiovascular Medicine, Kyushu University Graduate  
17 School of Medical Sciences, Fukuoka, Japan. <sup>6</sup>Department of Cardiology, Graduate School of  
18 Medicine, International University of Health and Welfare, Okawa, Japan. <sup>7</sup>Department of  
19 Bioengineering, Graduate School of Engineering, The University of Tokyo, Tokyo, Japan.

20 <sup>8</sup>Tokorozawa Heart Center, Tokorozawa, Japan. <sup>9</sup>Inanami Spine & Joint Hospital/Iwai Orthopaedic  
21 Medical Hospital, Iwai Medical Foundation, Tokyo, Japan. <sup>10</sup>Department of Internal Medicine,  
22 <sup>11</sup>Center of Sports Science and Health Promotion, <sup>12</sup>Department of Assistive Technology,  
23 <sup>13</sup>Department of Clinical Research, National Rehabilitation Center for Persons with Disabilities,  
24 Tokorozawa, Japan.

25 <sup>14</sup>These authors contributed equally: Shuhei Murase, Naoyoshi Sakitani.

26 \*Correspondence to Yasuhiro Sawada, Department of Clinical Research, National Rehabilitation  
27 Center for Persons with Disabilities, 4-1 Namiki, Tokorozawa, Saitama 359-8555, Japan, Tel: +81-  
28 4-2995-3100, Fax: +81-4-2995-0355, Email: ys454-ind@umin.ac.jp

29

## 30 **Abstract**

31 **Nervous cell functions are known to be physiologically regulated by mechanical factors in the**  
32 **brain. However, it remains unclear whether mechanical interventions can modulate the**  
33 **pathophysiological processes underlying brain-related disorders and modify their**  
34 **consequences. Here we show that passive head motion of hypertensive rats, which reproduces**  
35 **mechanical accelerations generated at their heads during treadmill running at a moderate**  
36 **velocity, decreases the expression of angiotensin II type 1 receptor (AT1R) in astrocytes in**  
37 **their rostral ventrolateral medulla (RVLM). This decrease results in lowering their blood**

38 **pressure. Passive head motion generates interstitial fluid movement that is estimated to exert**  
39 **shear stress with average magnitude of a few Pa on cells in rats' brainstem. Fluid shear stress**  
40 **of a relevant magnitude decreases AT1R expression in cultured astrocytes, but not in neuronal**  
41 **cells. Furthermore, in hypertensive rats, inhibition of movement of interstitial fluid by its**  
42 **gelation with reactive polyethylene glycol injected into the RVLM eliminates the ability of**  
43 **passive head motion to decrease their blood pressure and AT1R expression in RVLM**  
44 **astrocytes. Consistent with these results from animal experiments, vertically oscillating chair**  
45 **riding of hypertensive adult humans, which reproduces mechanical accelerations generated at**  
46 **their heads during light jogging or fast walking, lowers their blood pressure. Our findings**  
47 **indicate that moderate mechanical impact on the head has an antihypertensive effect by**  
48 **modulating the function of RVLM astrocytes through interstitial fluid shear stress. We**  
49 **anticipate mechanical regulation to underlie a variety of positive effects of physical exercise**  
50 **on human health, particularly those related to brain functions.**

51

## 52 **Introduction**

53 Hypertension, which is a major cause of stroke and cardiovascular diseases, is the biggest risk  
54 factor for death worldwide<sup>1</sup>. Whereas numerous antihypertensive drugs have been developed and  
55 used clinically, physical exercise is known to be effective for the treatment and prevention of  
56 essential hypertension<sup>2,3</sup>, which comprises the majority (>90%) of human hypertension<sup>4</sup>. Although

57 long-term regulation of blood pressure (BP) has been recognized to be largely dependent on sodium  
58 excretion adjusting systems, which mainly involve kidney functions<sup>5</sup>, elevated activity of the  
59 sympathetic nervous system also importantly contributes to the development of hypertension<sup>6-8</sup>.  
60 Rostral ventrolateral medulla (RVLM), which is located in the brainstem, plays a critical role in  
61 determining the basal activity of the sympathetic nervous system, and its functional integrity is  
62 essential for the maintenance of basal vasomotor tone and regulation of BP<sup>6,9</sup>. Angiotensin II (Ang  
63 II) is the major bioactive peptide of the renin-angiotensin system (RAS), and is known to regulate  
64 BP as well as other biological processes such as cell growth/apoptosis/migration, inflammation, and  
65 fibrosis<sup>10</sup>. The biological effects of Ang II are mediated by its interaction with two distinct high-  
66 affinity G protein-coupled receptors, Ang II type 1 receptor (AT1R) and type 2 receptor. Of these  
67 receptors, AT1R is responsible for most of the known physiological and pathophysiological  
68 processes related to Ang II. Whereas RAS is involved in the functional regulation of various  
69 “peripheral” organs and tissues such as kidney and vessels, it also regulates brain functions within  
70 the blood-brain barrier, including the control and maintenance of sympathetic nerve activity and  
71 cognitive ability<sup>11</sup>. In particular, the role of AT1R signaling in the RVLM in cardiovascular  
72 regulation has been extensively studied and demonstrated. For example, the pressor/depressor  
73 responses to Ang II and Ang II antagonists, injected into the RVLM have been reported to be  
74 enhanced in spontaneously hypertensive rats (SHRs)<sup>12,13</sup>. We have previously demonstrated that



75 treadmill running at moderate velocities alleviates the sympathetic nerve activity, involving  
76 attenuation of AT1R signaling in the RVLM of stroke-prone spontaneously hypertensive rats  
77 (SHRSPs)<sup>14</sup>, a substrain of SHRs that exhibit severer hypertension as compared with SHRs<sup>15</sup>.  
78 However, the details about the changes in AT1R signaling in the RVLM of these hypertensive rats  
79 have yet to be elucidated. It remains unclear what type(s) of cells (e.g., neurons or astrocytes) are  
80 primarily responsible for the altered AT1R signaling in the RVLM of SHRs or SHRSPs.  
81 Furthermore, the causal relationship between the increased AT1R signal activity in the RVLM and  
82 high BP in SHRs or SHRSPs in their steady state (i.e., apart from their responses to  
83 pharmacological interventions) is left unrevealed.

84 AT1R has also been shown to play a vital role in regulating a variety of physiological or  
85 pathological processes, including cellular responses to mechanical perturbations<sup>16,17</sup>. For example,  
86 mechanical stretching of cardiac myocytes activates AT1R signaling<sup>18</sup>, and fluid shear stress (FSS)  
87 of average 1.5 Pa lowers AT1R expression in human vein endothelial cells<sup>19</sup>. Although intervening  
88 the Ang II-AT1R system through pharmacological approaches, such as administration of  
89 angiotensin-converting enzyme inhibitor or selective AT1R blocker, has been established as an  
90 effective therapeutic strategy for hypertension<sup>20</sup>, mechano-responsive attenuation of AT1R signaling  
91 has not been clinically utilized as an antihypertensive measure.

92 Many of physical workouts, particularly aerobic exercises, involve vertical body motions,

93 which generate mechanical impacts (accelerations) on the head at the time of foot contact with the  
94 ground (i.e., landing). The importance of mechanical loads is well established in the physiological  
95 regulation of bones, the stiffest organ that only allows tiny deformation<sup>21</sup>. Osteocytes, the  
96 mechanosensory cells embedded in bones<sup>22</sup>, are assumed to undergo minimal deformations under  
97 physiological conditions. We have reported that FSS on osteocytes derived from interstitial fluid  
98 flow induced upon physical activity plays an important role in maintaining bone homeostasis<sup>23</sup>.  
99 Given that the brain is not a rigid organ, minimally deforming forces or stress distribution changes  
100 in the brain during exercise or even activity of daily living (e.g., walking) may produce beneficial  
101 effects. We have previously shown that in the prefrontal cortex (PFC) of rodents, moderate  
102 mechanical impact-induced FSS modulates serotonin signaling in the neurons in situ<sup>24</sup>. Based on  
103 these previous findings together with the distribution of interstitial fluid throughout the whole brain,  
104 we hypothesized that moderate mechanical impact on the head might have antihypertensive effects  
105 involving FSS-mediated modulation of AT1R signaling in the RVLM.

106

## 107 **Results**

108 **Application of cyclical mechanical impact to the head by passive motion lowers the BP in**

109 **SHRSPs.** To determine the effects of a mechanical intervention of a moderate intensity on BP, we

110 first sought to develop an experimental system that reproduces the impact exerted on the head

111 during rats' treadmill running at a modest velocity (20 m/minute), a typical experimental  
112 intervention to test the effects of physical exercise on rats<sup>25,26</sup>. In a recent study, we observed that  
113 treadmill running of rats (20 m/minute) generated 5-mm vertical oscillation of their heads with ~1.0  
114 x g peak accelerations and 2-Hz frequency; therefore, we developed a "passive head motion"  
115 (PHM) system to produce 2-Hz 5-mm vertical oscillation exerting 1.0 x g acceleration peaks at the  
116 heads of rats<sup>24</sup>. In the current study, we examined the effects of mechanical impact on BP in  
117 SHRSPs, using the PHM system. Similar to the antihypertensive effect of treadmill running on  
118 SHRs or SHRSPs that we and others reported previously<sup>14,25,27</sup>, application of PHM (30  
119 minutes/day, 28 consecutive days; see Fig. 1a) significantly lowered their BP (Fig. 1b,c) as  
120 compared to their controls, whereas HR was not significantly affected by PHM (Fig. 1d).  
121 Anesthesia alone (daily 30 minutes) did not significantly alter the BP in SHRSPs (Extended Data  
122 Fig. 1a), indicating that the antihypertensive effect resulted specifically from PHM. The anti-cardiac  
123 hypertrophy effect of PHM on SHRSPs (Fig. 1e) as well as the lack of these PHM effects on control  
124 normotensive rats (Wistar-Kyoto: WKY) (Fig. 1b,c,e) were also consistent with previous reports  
125 describing treadmill running as an antihypertensive intervention for SHRs<sup>27</sup>. As was observed in our  
126 treadmill running experiments<sup>14</sup>, PHM decreased 24-hour urinary norepinephrine excretion of  
127 SHRSPs (Fig. 1f). This suggests that PHM mitigates the sympathetic hyperactivity<sup>28</sup>. Collectively,  
128 these results support our hypothesis that cyclical moderate mechanical impact on the head has an

129 antihypertensive effect.

130

131 **PHM down-regulates AT1R expression in RVLM astrocytes of SHRSPs.** We then looked into

132 the mechanism of how PHM alleviated the development of hypertension in SHRSPs. We previously

133 reported that down-regulation of AT1R signaling in the RVLM is responsible for the treadmill

134 running-induced sympathoinhibition in SHRSPs<sup>14</sup>. Given the mechanical regulation of AT1R

135 expression in endothelial cells<sup>19</sup>, we examined whether PHM modulated AT1R expression in RVLM

136 neurons and astrocytes of SHRSPs. In our histochemical analysis, we defined neuronal nuclei

137 (NeuN)-positive cells as neurons<sup>29</sup> and glial fibrillary acidic protein (GFAP)-positive cells as

138 astrocytes<sup>30</sup>. PHM (30 minutes/day, 28 days) did not significantly change the relative population of

139 AT1R-expressing neurons and astrocytes in the RVLM of WKY rats (Fig. 1g). In contrast, 4-week

140 PHM significantly decreased the expression of AT1R in the astrocytes, but not in the neurons, of

141 SHRSPs' RVLM (Fig. 1h). Notably, AT1R expression in the RVLM neurons was comparable

142 between WKY rats and SHRSPs, either with and without PHM (Fig. 1i). In contrast, AT1R

143 expression was significantly higher in the RVLM astrocytes of SHRSPs without PHM (Fig. 1j,

144 column 3). PHM lowered the AT1R expression in the RVLM astrocytes of SHRSPs to the level

145 equivalent to that of WKY rats (Fig. 1j, columns 1, 2, and 4). Taken together, AT1R expression in

146 RVLM astrocytes appeared to be correlated with the antihypertensive effect of PHM on SHRSPs. In

147 line with this observation, 4-week treadmill running of SHRSPs also decreased the AT1R  
148 expression in their RVLM astrocytes, but not neurons (Extended Data Fig. 1b–d).  
149  
150 **PHM alleviates the sensitivity of RVLM in SHRSPs to Ang II or Ang II antagonist.** We next  
151 sought to examine whether the PHM-induced decrease in AT1R expression in the RVLM astrocytes  
152 of SHRSPs (Fig. 1j, columns 3 and 4) was functionally relevant to the suppression of AT1R  
153 signaling. To this end, we analyzed the pressor responses to Ang II injected into unilateral RVLM of  
154 WKY rats and SHRSPs, either subjected to 4-week PHM or left sedentary under anesthesia (30  
155 minutes/day, 28 days) (Fig. 2a). As we previously reported<sup>14</sup>, SHRSPs without PHM exhibited  
156 significantly greater pressor response to Ang II administered to RVLM than WKY rats (Fig. 2b,  
157 compare between top and bottom of left panels; Fig. 2c, compare columns 1 and 3). Four-week  
158 PHM ameliorated the pressor response to Ang II injected into the RVLM of SHRSPs, but not of  
159 WKY rats (Fig. 2b, compare left and right; Fig. 2c, compare columns 1 vs. 2 and 3 vs. 4).  
160 Furthermore, depressor responses to Ang II antagonist injected into unilateral RVLM<sup>13</sup> of WKY rats  
161 and SHRSPs with and without 4-week PHM appeared to be approximate mirror images of the  
162 pressor responses (Fig. 2d,e). These results support the functional relevance of the PHM-induced  
163 decrease in AT1R expression in the RVLM astrocytes of SHRSPs (Fig. 1j).

164 To examine whether the increased AT1R expression in the RVLM astrocytes of SHRSPs was

165 associated with their development of hypertension, we manipulated AT1R signaling by introducing  
166 exogenous expression of AT1R-associated protein (AGTRAP), which interacts with AT1R and  
167 tempers Ang II-mediated signals by promoting AT1R internalization<sup>31</sup>. To this end, we used an  
168 adeno-associated virus (AAV)-mediated gene delivery system<sup>32</sup>. AAV serotype 9 (AAV9) vectors  
169 were injected locally to transduce RVLM cells (Fig. 3a and Extended Data Fig. 2a). To achieve  
170 astrocyte- and neuron-specific gene expression, we used AAV9 vectors that harbored mouse GFAP  
171 promoter (AAV-GFAP) and rat neuron-specific enolase (NSE) promoter (AAV-NSE), respectively  
172 (Fig. 3a). Because these vectors contained a region encoding GFP and 2A sequence of porcine  
173 teschovirus-1 (P2A; self-cleaving peptides<sup>33</sup>) (Fig. 3a), observation of green fluorescence allowed  
174 us to identify the cells in which transgene was expressed (Fig. 3b,c and Extended Data Fig. 2a–e).  
175 AAV-mediated expression of AGTRAP in astrocytes (Fig. 3b) but not in neurons (Fig. 3c) of  
176 bilateral RVLMs in SHRSPs significantly lowered the BP as compared with their control SHRSPs  
177 in which only GFP was virally expressed in RVLM astrocytes or neurons (Fig. 3d,e). Furthermore,  
178 AAV-mediated expression of AGTRAP in astrocytes, but not neurons, of SHRSPs' bilateral RVLMs  
179 decreased 24-hour urinary norepinephrine excretion (Fig. 3f). Injection of control AAV vector  
180 (GFAP-control or NSE-control) did not significantly affect the BP of SHRSPs (Extended Data Fig.  
181 2f). These results support the importance of AT1R signal intensity in RVLM astrocytes for SHRSPs'  
182 development of hypertension and sympathetic hyperactivity, as well as the physiological relevance

183 of PHM-induced decrease in AT1R expression we observed in the RVLM astrocytes of SHRSPs  
184 (Fig. 1j).

185

186 **PHM generates low-amplitude pressure waves and induces interstitial fluid movement in rat**

187 **RVLM.** We then sought to determine the physical effects that PHM produced in rat RVLM. To do

188 so, we analyzed local pressure changes using a telemetry pressure sensor (Fig. 4a) as we described

189 previously<sup>24</sup>. PHM generated pressure waves (changes) with ~1.2 mm Hg peak amplitude (Fig.

190 4b–d). Hydrostatic pressure of this magnitude (~1.6 cm H<sub>2</sub>O) is unlikely to initiate mechano-

191 responsive signaling in cells<sup>34</sup>. Postulating an analogy to osteocytes embedded in bones, the

192 function of which is known to be modulated by interstitial fluid flow-derived shear stress<sup>23</sup>, we have

193 demonstrated that minimal stress distribution changes generate interstitial fluid flow in the brain,

194 resulting in shear stress-mediated regulation of nervous cell functions<sup>24</sup>.

195 To analyze the PHM-induced interstitial fluid movement in the RVLM, we injected an iodine-

196 based contrast agent (Isovist<sup>®</sup>) into the RVLM of anesthetized rats, and tracked its distribution with

197 sequential computed tomography (CT) (Fig. 4e) as we previously did to quantify the movement of

198 intramuscular interstitial fluid<sup>35</sup>. We found that PHM significantly promoted Isovist spreading in the

199 rostral-caudal and dorsal-ventral (*y*- and *z*-axes, Fig. 4f) directions (Fig. 4g,h). In contrast, PHM did

200 not significantly affect the left-right spreading (*x*-axis, Fig. 4f) of Isovist (Fig. 4g,h). As we

201 observed in rat PFC<sup>24</sup>, PHM induced interstitial fluid movement in the brainstem in defined  
202 directions, rather than in an isotropic manner. Our simulative calculation suggests that PHM  
203 subjected RVLM cells to interstitial fluid flow-derived shear stress with an average magnitude of  
204 0.59–2.64 Pa (Supplementary Table 1). FSS of this magnitude is known to modify the physiological  
205 function of astrocytes<sup>36</sup>, leading us to hypothesize that FSS derived from interstitial fluid movement  
206 (Fig. 4e–h) mediated the PHM-induced decrease in AT1R expression in RVLM astrocytes (Fig. 1j).

207

208 **FSS on astrocytes decreases AT1R expression in vitro.** To test this hypothesis, we conducted in  
209 vitro FSS experiments. Based on our simulation (Supplementary Table 1), we applied pulsatile FSS  
210 with an average magnitude of 0.7 Pa to cultured primary astrocytes, which were prepared from  
211 astrocyte-GFP mice<sup>37</sup> (Extended Data Fig. 3a), using a system we previously reported<sup>23,24,35,38</sup>.

212 Quantitative polymerase chain reaction (qPCR) and immunostaining analyses revealed that FSS  
213 application (0.5 Hz, 30 minutes) significantly decreased AT1R expression in astrocytes for at least  
214 24 hours (Fig. 5a–c). In contrast, FSS application to Neuro2A cells, which exhibit neuronal  
215 phenotypes and morphology<sup>39,40</sup>, did not decrease AT1R expression (Extended Data Fig. 3b–d).

216 Consistent with the decreasing effect of FSS on AT1R expression, the binding of fluorescently  
217 labeled Ang II to cultured astrocytes was significantly decreased by pre-exposure to 30-minute FSS  
218 (Fig. 5d,e). The duration (>24 hours) of FSS effects on AT1R expression in astrocytes (Fig. 5) poses



219 a possibility of cumulative effects of FSS applied repeatedly at 24-hour intervals. Therefore, these  
220 in vitro observations suggest that FSS-mediated persistent reduction of AT1R expression is involved  
221 in the effects of daily PHM application on BP (Fig. 1b,c) and AT1R expression in the RVLM  
222 astrocytes (Fig. 1j) in SHRSPs.

223

224 **Hindrance of interstitial fluid movement by hydrogel introduction in RVLM eliminates the**  
225 **ability of PHM to decrease the AT1R expression in RVLM astrocytes and the BP in SHRSPs.**

226 To examine whether interstitial fluid movement in the RVLM mediated the effects of PHM on BP  
227 and AT1R expression in RVLM astrocytes of SHRSPs, we modulated local interstitial fluid  
228 dynamics. Following the procedure we used to hinder the interstitial fluid movement in mouse  
229 PFC<sup>24</sup>, we gelled interstitial fluid in situ and deprived its fluidity by microinjecting mutually  
230 reactive polyethylene glycol (PEG) gel-precursor (pre-gel) solutions to RVLM (Fig. 6a). Injected  
231 pre-gel solution spread over rat RVLM, and gelled the interstitial fluid in situ (Extended Data Fig.  
232 4a).

233 Hydrogel introduction in bilateral RVLMs eliminated the ability of PHM to decrease BP (Fig.  
234 6b, black and orange lines; Fig. 6c, columns 2 and 3), urinary norepinephrine excretion (Fig. 6d,  
235 columns 2 and 3), and AT1R expression in the RVLM astrocytes (Fig. 6e, bottom 2 rows; Fig. 6f,  
236 columns 2 and 3) in SHRSPs. In contrast, hydrogel introduction increased BP (Fig. 6b, blue and

237 orange lines; Fig. 6c, columns 1 and 3), norepinephrine excretion (Fig. 6d, columns 1 and 3), and  
238 AT1R expression in the RVLM astrocytes (Fig. 6e, top 2 rows; Fig. 6f, columns 1 and 3) of  
239 SHRSPs subjected to PHM. AT1R expression in the RVLM neurons of SHRSPs remained unaltered  
240 irrespective of the combination of PHM and hydrogel introduction (Fig. 6e,g). These results suggest  
241 that hydrogel introduction in the RVLM disrupts the mechanism mediating the PHM-induced  
242 decrease in BP, norepinephrine excretion, and AT1R expression in the RVLM astrocytes of  
243 SHRSPs.

244 We previously showed that gelation only inhibits the fluidity of the fluid but does not restrict  
245 the diffusion of small molecules inside the gel<sup>24,41</sup>. Consistently, hydrogel introduction did not  
246 apparently delay or attenuate the depressor response to Ang II antagonist injected to the RVLM  
247 (Extended Data Fig. 4b–d), indicating rapid solute diffusivity through the hydrogels. As was the  
248 case with mouse PFC<sup>24</sup>, gelation by injecting PEG solution did not affect overall cell number or  
249 apoptosis in RVLM (Extended Data Fig. 4e,f), and survival or apoptosis of RVLM astrocytes  
250 (Extended Data Fig. 4g,h) and neurons (Extended Data Fig. 4i,j). Collectively, the loss of PHM  
251 effects by hydrogel introduction in bilateral RVLMs of SHRSPs (Fig. 6b–f) is likely to result from  
252 hydrogel-mediated alteration in interstitial fluid dynamics, rather than decreased cell viability  
253 caused by impaired nutrient supply or removal of metabolic wastes.

254

255 **Vertically oscillating chair riding (VOCR) lowers BP in hypertensive adult humans.** The  
256 results from our animal experiments reveal the antihypertensive effect of mechanical accelerations  
257 generated at the head during treadmill running at a moderate velocity. This prompted us to test  
258 whether mechanical impact on the head lowered BP in hypertensive humans. As we observed light  
259 jogging or fast walking (locomotion at the velocity of 7 km/hour) typically produce ~2 Hz vertical  
260 acceleration waves with an amplitude of ~1.0 x g at the person's head (Extended Data Fig. 5a, top),  
261 we constructed a chair that could vertically oscillate at the frequency of 2 Hz (Extended Data Fig.  
262 5b) and produce ~1.0 x g acceleration waves at the head of the occupant (Extended Data Fig. 5a,  
263 bottom).

264 Given that previous reports regarding antihypertensive effects of aerobic exercise typically  
265 recommend  $\geq 3$ –4 days per week (frequency) and  $\geq 30$  minutes per session or day (duration)<sup>3</sup>, we set  
266 our regimen of VOCR as 3 days/week (Monday, Wednesday, and Friday unless needed to assign  
267 otherwise for particular reasons such as public holidays) and 30 minutes/day. Our study of protocol  
268 1, in which we simply compared the subjects' BP and HR before and after 4-week (12 times)  
269 VOCR (Extended Data Fig. 5c), showed that VOCR decreased BP in hypertensive humans (Fig.  
270 7a).

271 We then conducted a human study of protocol 2, in which we followed the changes in subjects'  
272 BP and HR more minutely (Extended Data Fig. 5d). Encouraged by the positive results from the

273 study of protocol 1, we adopted the same VOQR regimen as to its frequency (3 days/week) and  
274 duration (30 minutes/day). Participants were subjected to serial blood sampling to measure plasma  
275 catecholamines (epinephrine, norepinephrine, and dopamine) and renin activity, and serum  
276 aldosterone and C-reactive protein (CRP) before and after the intervention period (Extended Data  
277 Fig. 5d). To conduct the 2nd blood sampling on the next day of the last bout of VOQR, the  
278 intervention period was extended from 4 weeks (total 12 times, typically 26 days) to 4.5 weeks  
279 (total 14 times, 30–31 days) because blood sampling could not be done during weekends at our  
280 hospital. BP, both systolic and diastolic, and MAP immediately after the intervention period  
281 significantly decreased as compared with those immediately before the intervention period (Fig.  
282 7b). Furthermore, we also observed an antihypertensive effect of VOQR when we defined “BP of  
283 the week” to reliably detect the trends by reducing the influences from interday BP variability (see  
284 Methods) (Fig. 7c and Extended Data Fig. 6a). Notably, the post-intervention follow-up showed that  
285 the BP-lowering effect apparently persisted for 4 weeks, but not 5 weeks, after the last bout of  
286 VOQR (Fig. 7c). Similar to our animal study, we did not observe significant changes in HR by the  
287 VOQR intervention (Fig. 7a–c). Significant differences were not detected in the blood levels of  
288 catecholamines, aldosterone, renin activity, and CRP between before and after the VOQR  
289 intervention (Extended Data Fig. 6b).

290 Collectively, our studies of protocols 1 and 2 suggest that VOQR, which reproduces

291 mechanical impact exerted on the head during light jogging or fast walking, has an antihypertensive  
292 effect in hypertensive humans. Importantly, in none of 21 subjects (Supplementary Table 2),  
293 apparent adverse events, including motion sickness and low back pain, were observed or manifested  
294 in relation to the VOCR intervention.

295

## 296 **Discussion**

297 Essential hypertension is defined as high BP in which secondary causes including renovascular  
298 disease, renal failure, pheochromocytoma, and primary aldosteronism are not present. It accounts  
299 for >90% of human cases of hypertension, resulting from combinations of multiple genetic and  
300 environmental factors<sup>4</sup>. Recently, brain (dys)function has been implicated in the pathogenesis of  
301 essential hypertension; however, the details of their molecular link remain unclear<sup>42</sup>. Physical  
302 exercise is proven to be effective as a therapeutic/preventative measure for essential hypertension<sup>3</sup>.  
303 Although the antihypertensive effect of physical exercise has been shown to involve normalization  
304 of sympathetic hyperactivity in the brain<sup>43</sup>, it is still unclear whether exercise directly modulates  
305 brain function. In this study, PHM, which reproduced mechanical accelerations generated at the  
306 head during treadmill running, allowed us to dissect bodily activity-derived physical effects.

307       Whereas AT1R signaling in both neurons and astrocytes of the RVLM have been reported to be  
308 involved in regulating BP<sup>44,45</sup>, we observed that AT1R expression in RVLM astrocytes was

309 increased in SHRSPs as compared to that in WKY rats (Fig. 1j). In contrast, AT1R expression in  
310 RVLM neurons was comparable between WKY rats and SHRSPs (Fig. 1i), although AT1R  
311 expression in RVLM neurons has been shown to play an important role in other animal model(s) of  
312 hypertension<sup>44</sup>. Together with the decreases in BP and urinary epinephrine excretion of SHRSPs in  
313 which RVLM astrocytes were transduced with AGTRAP gene (Fig. 3d–f), the intensity of AT1R  
314 signaling in RVLM astrocytes appears to be critically involved in the pathogenesis of hypertension  
315 and sympathetic hyperactivity in SHRSPs.

316 Four-week PHM decreased urinary norepinephrine excretion and AT1R expression in RVLM  
317 astrocytes of SHRSPs to the levels almost equivalent to those of WKY rats (Fig. 1f,j). However,  
318 PHM only partially alleviated the development of hypertension in SHRSPs to the extent similar to  
319 the antihypertensive effects of treadmill running we and others previously reported<sup>14,25</sup> (Fig. 1b,c).  
320 Therefore, it is evident that factors other than AT1R signaling in RVLM astrocytes contribute to the  
321 pathogenesis of essential hypertension.

322 AT1R expression in cultured astrocytes decreased upon FSS application (Fig. 5a–c). This was  
323 consistent with our findings that PHM and treadmill running decreased in AT1R expression in  
324 RVLM astrocytes of SHRSPs (Fig. 1j and Extended Data Fig. 1d). However, the AT1R expression  
325 level in RVLM astrocytes was low in WKY rats even without PHM (Fig. 1j), and this may raise a  
326 concern regarding the physiological relevance of our in vitro FSS experiments using cultured

327 astrocytes. Yet, it has been reported that cultured astrocytes typically exhibit increased “reactivity”,  
328 and do not fully recapitulate physiological astrocytes *in vivo*<sup>46</sup>. We suggest that the FSS-induced  
329 decrease in AT1R expression in cultured astrocytes we observed represents physiological functions  
330 of astrocytes, despite that their increased basal AT1R expression may relate to unphysiological  
331 aspects of two-dimensional culture on stiff substrates (culture plastics). Cells in static culture are  
332 exposed to a complete absence of FSS, which may not be physiologically realized *in vivo*. Previous  
333 reports describe increased extracellular fluid in brains of hypertensive humans<sup>47</sup> and altered  
334 dynamics of intracerebral interstitial fluid of SHR<sup>48</sup>. Aberrant regulation of RVLM astrocytes’  
335 function that relates to altered interstitial fluid movement-derived FSS may underlie the  
336 pathogenesis of essential hypertension.

337 PHM did not significantly alter the AT1R expression in SHRSPs’ RVLM neurons (Fig. 1i), and  
338 FSS did not decrease AT1R expression in cultured Neuro2A cells (Extended Data Fig. 3b–d). Yet,  
339 we do not suspect that these results represent the absence of sensitivity of neurons to FSS or other  
340 type(s) of mechanical stimulation, particularly because we observed PHM- and FSS-induced  
341 internalization of 5-HT<sub>2A</sub> receptor expressed in mouse PFC neurons and Neuro2A cells,  
342 respectively<sup>24</sup>. Alternatively, we speculate that PHM and FSS may mitigate hyperexpression of  
343 AT1R related to aforementioned pathological status of SHRSPs’ RVLM astrocytes or  
344 unphysiological nature of cultured astrocytes. In line with this notion, PHM did not significantly

345 affect the AT1R expression in RVLM astrocytes in normotensive WKY rats (Fig. 1j). Relevantly,  
346 we and others have reported mechanical loading (in vivo)- or FSS (in vitro)- induced alleviation of  
347 inflammatory processes<sup>23,49</sup>, which can transcriptionally increase AT1R expression<sup>50</sup>.

348 Whereas the amplitude of pressure waves that PHM generated in rat RVLM was tiny (Fig.  
349 4b–d), the magnitude of interstitial fluid movement-derived shear stress in rat RVLM appeared  
350 comparable with that of FSS previously reported for vascular endothelium<sup>51,52</sup>, interstitium of  
351 bone<sup>21</sup> and skeletal muscle<sup>35</sup> (Supplementary Table 1b). Consistent with the lack of strict cell  
352 specificity in many of cellular responses to mechanical forces<sup>53</sup>, FSS-induced decrease in AT1R  
353 expression, which was reported in vascular cells<sup>19</sup>, was also observed in cultured astrocytes. Taken  
354 together, we speculate that there may be common homeostasis-regulatory mechanisms at the  
355 cellular level that involve fluid flow-derived shear stress of ~0.5 to a few Pa.

356 Based on our hypothesis concerning the similarity in the pathogenesis of high BP between  
357 human essential hypertension and SHRSPs, we conducted human studies in which we intended to  
358 reproduce the mechanical impact on the head that lowered the BP in SHRSPs. Although the  
359 mechanism behind the apparent antihypertensive effect of VOICR remains to be determined, the  
360 significant role of interstitial fluid dynamics in the RVLM, which we demonstrated by our animal  
361 experiments, might be shared between humans and rats or other animals (Extended Data Fig. 7).  
362 Whereas plasma catecholamine levels were not significantly changed by the VOICR intervention



363 (Extended Data Fig. 6b), it is possible that urinary epinephrine measures collected over 24 hours in  
364 our rat PHM experiments (Fig. 1f, 3f, and 6d) enhanced our ability to capture the sympathetic nerve  
365 activity under “everyday-life” ambulatory conditions<sup>54</sup>.

366 As the phrase “Exercise is Medicine” indicates, physical exercise is broadly useful to maintain  
367 human health. Many of aerobic exercises, including walking and running, involve impact-  
368 generating bodily actions creating sharp accelerations at the head upon foot contacting with the  
369 ground. Therefore, their beneficial effects as therapeutic/preventative procedures for a variety of  
370 brain function-related diseases and health disorders may rely at least partly on modest changes in  
371 mechanical stress distribution in the brain, which may prompt optimal FSS on intracerebral nervous  
372 cells. While we have recently demonstrated that brain function can be physiologically regulated by  
373 mechanical forces<sup>24</sup>, alterations in interstitial fluid movement-derived shear stress may underlie the  
374 pathogenesis of various brain disorders, particularly those related to physical inactivity or aging.

375 **Limitation of study.** There are several limitations of this study. We were unable to test the response  
376 of primary neurons, which were prepared from mouse cerebral cortex or hippocampus, to FSS of  
377 relevant magnitudes (0.59–2.64 Pa, see Supplementary Table 1b) because of their easy detachment  
378 from the substrates by FSS. As an alternative of cultured neuronal cells, we tested Neuro2A cells,  
379 which stably adhered to the substrates through FSS of magnitudes up to ~1 Pa<sup>24</sup>.

380 We did not comprehensively analyze the effects of PHM on brain functions, but focused on the

381 study of RVLM. PHM may modulate AT1R signaling in other brain regions that participate in the  
382 regulation of sympathetic nerve activity, including the anteroventral third ventricle, paraventricular  
383 nucleus of the hypothalamus, and nucleus tractus solitarii<sup>6,9</sup>. Nonetheless, elimination of PHM  
384 effects on BP and urinary norepinephrine excretion by hydrogel introduction in RVLM (Fig. 6b–d)  
385 supports the critical role for RVLM. Because hydrogel may exert yet unknown effects, experiments  
386 of hydrogel introduction may not entirely prove the contribution of interstitial fluid movement. For  
387 example, hydrogel introduction may alter the stiffness and elasticity of extracellular matrix, which  
388 are known to affect the neurological physiology, pathology, and development<sup>55</sup>. Although further  
389 studies are required to address these issues, our findings suggest that mechanical factors can be a  
390 therapeutic target within the blood-brain barrier, the accessibility to which of antihypertensive drugs  
391 appears variable and controversial<sup>56</sup>.

392 Unlike the case of PHM in rats, VOCR of humans generates vertical accelerations at various  
393 body parts in addition to the head. Therefore, we cannot preclude the possibility that the  
394 antihypertensive effect of VOCR is mediated by mechanical regulation of tissues and organs other  
395 than the brain. Furthermore, our clinical studies of protocol 1 and 2 are based on a small number of  
396 subjects (Supplementary Table 2) with a fixed condition (frequency of 2 Hz, peak acceleration of  
397  $\sim 1.0 \times g$ , 30 minutes/day, 3 days/week, 12–14 rides), and need further analysis with a much larger  
398 sample size and varying conditions to determine optimal VOCR. Still, application of vertical

399 mechanical impacts with moderate magnitudes is expected to be highly safe with minimal  
400 possibility of adverse effects, providing a novel therapeutic/preventative strategy for physical  
401 disorders including those that are resistant to conventional treatments such as drug administration.  
402 Notably, our approach utilizing mechanical interventions may bring considerable benefits to those  
403 who cannot receive benefits from exercise because of physical disabilities.

404

#### 405 **Data availability**

406 All data are included in this article and its supplementary information files. Raw data are available  
407 from the corresponding author upon reasonable request.

408

#### 409 **Acknowledgements**

410 We thank K. Nakanishi, K. Hamamoto, and N. Kume for their consistent support. This work was in  
411 part supported by Intramural Research Fund from the Japanese Ministry of Health, Labour and  
412 Welfare; Grants-in-Aid for Scientific Research from the Japan Society for the Promotion of Science  
413 (15H01820, 15H04966, and 18H04088 to Y.S; 17H02127 and 18H03138 to T.O.; 19K06899 to  
414 A.K.); MEXT-Supported Program for the Strategic Research Foundation at Private Universities,  
415 2015–2019 from the Japanese Ministry of Education, Culture, Sports, Science and Technology  
416 (S1511017 to Y.S. and T.O.); Brain Mapping by Integrated Neurotechnologies for Disease Studies

417 from the Japan Agency for Medical Research and Development (AMED Brain/MINDS,  
418 JP20dm0207057 to H.H.).

419

#### 420 **Author contributions**

421 S.M. and N.S. conducted most of the experiments. Y.S. conceived the research, designed the study,  
422 and led the project with help from M.N. and M.S. T.K. provided technical advice for all the  
423 experiments involving measurement of cardiovascular parameters. S.M., N.S., T.K., M.S. and Y.S.  
424 wrote the manuscript. T.M. and A.T. contributed to the design and construction of the machine for  
425 PHM. D.Y. helped in vitro FSS experiments and carried out simulative calculation of in vivo FSS.  
426 T.S. and Y.Y. developed and provided the PEG hydrogel system. A.K. and H.H. prepared and  
427 provided AAV vectors. K.T., T.K., M.A., H.I., and T.O. contributed to the human studies. K.S., T.S.,  
428 S.T. M.S., T.O., and M.N. provided technical, advisory and financial support.

429

#### 430 **Competing interests**

431 The authors declare no competing interest. S.M., T.M., T.O., A.T., and Y.S. joined the application of  
432 a patent for the vertically oscillating chair, which has been awarded in Japan (JP6592834) and filed  
433 internationally (US16/616,935; EP18806753.2; CN201880033284.0; IN201927048891).

434

435 **References**

- 436 1. Lim, S.S., *et al.* A comparative risk assessment of burden of disease and injury attributable to  
437 67 risk factors and risk factor clusters in 21 regions, 1990-2010: a systematic analysis for the  
438 Global Burden of Disease Study 2010. *Lancet* **380**, 2224-2260 (2012).
- 439 2. Hagberg, J.M., Park, J.J. & Brown, M.D. The role of exercise training in the treatment of  
440 hypertension: an update. *Sports Med* **30**, 193-206 (2000).
- 441 3. Pescatello, L.S., MacDonald, H.V., Lamberti, L. & Johnson, B.T. Exercise for hypertension: a  
442 prescription update integrating existing recommendations with emerging research. *Curr*  
443 *Hypertens Rep* **17**, 87 (2015).
- 444 4. Carretero, O.A. & Oparil, S. Essential hypertension. Part I: definition and etiology. *Circulation*  
445 **101**, 329-335 (2000).
- 446 5. Guyton, A.C. Abnormal renal function and autoregulation in essential hypertension.  
447 *Hypertension* **18**, III49-53 (1991).
- 448 6. Guyenet, P.G. The sympathetic control of blood pressure. *Nat Rev Neurosci* **7**, 335-346 (2006).
- 449 7. Grassi, G., Mark, A. & Esler, M. The sympathetic nervous system alterations in human  
450 hypertension. *Circ Res* **116**, 976-990 (2015).
- 451 8. Malpas, S.C. Sympathetic nervous system overactivity and its role in the development of  
452 cardiovascular disease. *Physiol Rev* **90**, 513-557 (2010).
- 453 9. Dampney, R.A. Functional organization of central pathways regulating the cardiovascular  
454 system. *Physiol Rev* **74**, 323-364 (1994).
- 455 10. Fyhrquist, F. & Saijonmaa, O. Renin-angiotensin system revisited. *J Intern Med* **264**, 224-236  
456 (2008).
- 457 11. Forrester, S.J., *et al.* Angiotensin II signal transduction: an update on mechanisms of  
458 physiology and pathophysiology. *Physiol Rev* **98**, 1627-1738 (2018).
- 459 12. Ito, S., Komatsu, K., Tsukamoto, K., Kanmatsuse, K. & Sved, A.F. Ventrolateral medulla AT1  
460 receptors support blood pressure in hypertensive rats. *Hypertension* **40**, 552-559 (2002).
- 461 13. Muratani, H., Ferrario, C.M. & Averill, D.B. Ventrolateral medulla in spontaneously  
462 hypertensive rats: role of angiotensin II. *Am J Physiol* **264**, R388-395 (1993).
- 463 14. Kishi, T., *et al.* Exercise training causes sympathoinhibition through antioxidant effect in the  
464 rostral ventrolateral medulla of hypertensive rats. *Clin Exp Hypertens* **34**, 278-283 (2012).
- 465 15. Nabika, T., Ohara, H., Kato, N. & Isomura, M. The stroke-prone spontaneously hypertensive  
466 rat: still a useful model for post-GWAS genetic studies? *Hypertens Res* **35**, 477-484 (2012).
- 467 16. Lu, X., *et al.* Effects of local mechanical stimulation on coronary artery endothelial function  
468 and angiotensin II type 1 receptor in pressure or flow-overload. *J Hypertens* **31**, 720-729  
469 (2013).

- 470 17. Galie, P.A., Russell, M.W., Westfall, M.V. & Stegemann, J.P. Interstitial fluid flow and cyclic  
471 strain differentially regulate cardiac fibroblast activation via AT1R and TGF- $\beta$ 1. *Exp Cell Res*  
472 **318**, 75-84 (2012).
- 473 18. Zou, Y., *et al.* Mechanical stress activates angiotensin II type 1 receptor without the  
474 involvement of angiotensin II. *Nat Cell Biol* **6**, 499-506 (2004).
- 475 19. Ramkhelawon, B., *et al.* Shear stress regulates angiotensin type 1 receptor expression in  
476 endothelial cells. *Circ Res* **105**, 869-875 (2009).
- 477 20. Li, E.C., Heran, B.S. & Wright, J.M. Angiotensin converting enzyme (ACE) inhibitors versus  
478 angiotensin receptor blockers for primary hypertension. *Cochrane Database Syst Rev*,  
479 CD009096 (2014).
- 480 21. Weinbaum, S., Cowin, S.C. & Zeng, Y. A model for the excitation of osteocytes by mechanical  
481 loading-induced bone fluid shear stresses. *J Biomech* **27**, 339-360 (1994).
- 482 22. Tatsumi, S., *et al.* Targeted ablation of osteocytes induces osteoporosis with defective  
483 mechanotransduction. *Cell Metab* **5**, 464-475 (2007).
- 484 23. Miyazaki, T., *et al.* Mechanical regulation of bone homeostasis through p130Cas-mediated  
485 alleviation of NF- $\kappa$ B activity. *Sci Adv* **5**, eaau7802 (2019).
- 486 24. Ryu, Y., *et al.* Mechanical regulation underlies effects of exercise on serotonin-induced  
487 signaling in the prefrontal cortex neurons. *iScience* **23**, 100874 (2020).
- 488 25. Minami, N., *et al.* Effects of exercise and  $\beta$ -blocker on blood pressure and baroreflexes in  
489 spontaneously hypertensive rats. *Am J Hypertens* **16**, 966-972 (2003).
- 490 26. Kim, S.E., *et al.* Treadmill exercise prevents aging-induced failure of memory through an  
491 increase in neurogenesis and suppression of apoptosis in rat hippocampus. *Exp Gerontol* **45**,  
492 357-365 (2010).
- 493 27. Bertagnolli, M., *et al.* Exercise training reduces sympathetic modulation on cardiovascular  
494 system and cardiac oxidative stress in spontaneously hypertensive rats. *Am J Hypertens* **21**,  
495 1188-1193 (2008).
- 496 28. Chidsey, C.A., Braunwald, E. & Morrow, A.G. Catecholamine excretion and cardiac stores of  
497 norepinephrine in congestive heart failure. *Am J Med* **39**, 442-451 (1965).
- 498 29. Mullen, R.J., Buck, C.R. & Smith, A.M. NeuN, a neuronal specific nuclear protein in  
499 vertebrates. *Development* **116**, 201-211 (1992).
- 500 30. Freeman, M.R. Specification and morphogenesis of astrocytes. *Science* **330**, 774-778 (2010).
- 501 31. Tamura, K., *et al.* The physiology and pathophysiology of a novel angiotensin receptor-binding  
502 protein ATRAP/Agtrap. *Curr Pharm Des* **19**, 3043-3048 (2013).
- 503 32. Huda, F., *et al.* Distinct transduction profiles in the CNS via three injection routes of AAV9 and  
504 the application to generation of a neurodegenerative mouse model. *Mol Ther Methods Clin Dev*  
505 **1**, 14032 (2014).

- 506 33. Tang, X., *et al.* "Self-cleaving" 2A peptide from porcine teschovirus-1 mediates cleavage of  
507 dual fluorescent proteins in transgenic *Eimeria tenella*. *Vet Res* **47**, 68 (2016).
- 508 34. Tworkoski, E., Glucksberg, M.R. & Johnson, M. The effect of the rate of hydrostatic pressure  
509 depressurization on cells in culture. *PLoS One* **13**, e0189890 (2018).
- 510 35. Saitou, K., *et al.* Local cyclical compression modulates macrophage function in situ and  
511 alleviates immobilization-induced muscle atrophy. *Clin Sci (Lond)* **132**, 2147-2161 (2018).
- 512 36. Maneshi, M.M., *et al.* Mechanical stress activates NMDA receptors in the absence of agonists.  
513 *Sci Rep* **7**, 39610 (2017).
- 514 37. Gong, S., *et al.* A gene expression atlas of the central nervous system based on bacterial  
515 artificial chromosomes. *Nature* **425**, 917-925 (2003).
- 516 38. Yoshino, D., Sakamoto, N., Takahashi, K., Inoue, E. & Sato, M. Development of Novel Flow  
517 Chamber to Study Endothelial Cell Morphology: Effects of shear flow with uniform spatial  
518 gradient on distribution of focal adhesion. *J Biomech Sci Eng* **8**, 233-243 (2013).
- 519 39. Goshima, Y., Ohsako, S. & Yamauchi, T. Overexpression of Ca<sup>2+</sup>/calmodulin-dependent protein  
520 kinase II in Neuro2A and NG108-15 neuroblastoma cell lines promotes neurite outgrowth and  
521 growth cone motility. *J Neurosci* **13**, 559-567 (1993).
- 522 40. Yun, J., *et al.* Neuronal Per Arnt Sim (PAS) domain protein 4 (NPAS4) regulates neurite  
523 outgrowth and phosphorylation of synapsin I. *J Biol Chem* **288**, 2655-2664 (2013).
- 524 41. Fujiyabu, T., Toni, F., Li, X., Chung, U.I. & Sakai, T. Three cooperative diffusion coefficients  
525 describing dynamics of polymer gels. *Chem Commun (Camb)* **54**, 6784-6787 (2018).
- 526 42. Jennings, J.R., Muldoon, M.F. & Sved, A.F. Is the brain an early or late component of essential  
527 hypertension? *Am J Hypertens* (2020).
- 528 43. Joyner, M.J. & Green, D.J. Exercise protects the cardiovascular system: effects beyond  
529 traditional risk factors. *J Physiol* **587**, 5551-5558 (2009).
- 530 44. Jancovski, N., *et al.* Angiotensin type 1A receptor expression in C1 neurons of the rostral  
531 ventrolateral medulla contributes to the development of angiotensin-dependent hypertension.  
532 *Exp Physiol* **99**, 1597-1610 (2014).
- 533 45. Guo, F., *et al.* Astroglia are a possible cellular substrate of angiotensin(1-7) effects in the rostral  
534 ventrolateral medulla. *Cardiovasc Res* **87**, 578-584 (2010).
- 535 46. Liddel, S.A. & Barres, B.A. Reactive astrocytes: production, function, and therapeutic  
536 potential. *Immunity* **46**, 957-967 (2017).
- 537 47. MacLulich, A.M., *et al.* Higher systolic blood pressure is associated with increased water  
538 diffusivity in normal-appearing white matter. *Stroke* **40**, 3869-3871 (2009).
- 539 48. Bedussi, B., *et al.* Enhanced interstitial fluid drainage in the hippocampus of spontaneously  
540 hypertensive rats. *Sci Rep* **7**, 744 (2017).
- 541 49. Hahn, C. & Schwartz, M.A. Mechanotransduction in vascular physiology and atherogenesis.  
542 *Nat Rev Mol Cell Biol* **10**, 53-62 (2009).



- 543 50. Elton, T.S. & Martin, M.M. Angiotensin II type 1 receptor gene regulation: transcriptional and  
544 posttranscriptional mechanisms. *Hypertension* **49**, 953-961 (2007).
- 545 51. Galie, P.A., van Oosten, A., Chen, C.S. & Janmey, P.A. Application of multiple levels of fluid  
546 shear stress to endothelial cells plated on polyacrylamide gels. *Lab Chip* **15**, 1205-1212 (2015).
- 547 52. Kadohama, T., Nishimura, K., Hoshino, Y., Sasajima, T. & Sumpio, B.E. Effects of different  
548 types of fluid shear stress on endothelial cell proliferation and survival. *J Cell Physiol* **212**,  
549 244-251 (2007).
- 550 53. Iskratsch, T., Wolfenson, H. & Sheetz, M.P. Appreciating force and shape-the rise of  
551 mechanotransduction in cell biology. *Nat Rev Mol Cell Biol* **15**, 825-833 (2014).
- 552 54. Hughes, J.W., Watkins, L., Blumenthal, J.A., Kuhn, C. & Sherwood, A. Depression and anxiety  
553 symptoms are related to increased 24-hour urinary norepinephrine excretion among healthy  
554 middle-aged women. *J Psychosom Res* **57**, 353-358 (2004).
- 555 55. Li, S.C., *et al.* Tissue elasticity bridges cancer stem cells to the tumor microenvironment  
556 through microRNAs: implications for a "watch-and-wait" approach to cancer. *Curr Stem Cell*  
557 *Res Ther* **12**, 455-470 (2017).
- 558 56. Kishi, T., Hirooka, Y. & Sunagawa, K. Sympathoinhibition caused by orally administered  
559 telmisartan through inhibition of the AT(1) receptor in the rostral ventrolateral medulla of  
560 hypertensive rats. *Hypertens Res* **35**, 940-946 (2012).
- 561 57. Huang, N. & Bonn, D. Viscosity of a dense suspension in Couette flow. *J Fluid Mech* **590**, 497-  
562 507 (2007).
- 563 58. Sugiyama, S., *et al.* Computational simulation of convection-enhanced drug delivery in the  
564 non-human primate brainstem: a simple model predicting the drug distribution. *Neurol Res* **35**,  
565 773-781 (2013).
- 566 59. Yao, W., Shen, Z. & Ding, G. Simulation of interstitial fluid flow in ligaments: comparison  
567 among Stokes, Brinkman and Darcy models. *Int J Biol Sci* **9**, 1050-1056 (2013).
- 568 60. Tarbell, J.M. & Shi, Z.-D. Effect of the glycocalyx layer on transmission of interstitial flow  
569 shear stress to embedded cells. *Biomech Model Mechanobiol* **12**, 111-121 (2013).
- 570 61. Sakai, K., *et al.* Overexpression of eNOS in NTS causes hypotension and bradycardia in vivo.  
571 *Hypertension* **36**, 1023-1028 (2000).
- 572 62. Kishi, T., *et al.* Overexpression of eNOS in the RVLM causes hypotension and bradycardia via  
573 GABA release. *Hypertension* **38**, 896-901 (2001).
- 574 63. Paxinos, G. & Watson, C. *The rat brain in stereotaxic coordinates* (Academic Press, 1998).
- 575 64. Hirooka, Y., Polson, J.W. & Dampney, R.A. Pressor and sympathoexcitatory effects of nitric  
576 oxide in the rostral ventrolateral medulla. *J Hypertens* **14**, 1317-1324 (1996).
- 577 65. Shinohara, Y., *et al.* Effects of neutralizing antibody production on AAV-PHP.B-mediated  
578 transduction of the mouse central nervous system. *Mol Neurobiol* **56**, 4203-4214 (2019).



- 579 66. Shinohara, Y., Ohtani, T., Konno, A. & Hirai, H. Viral vector-based evaluation of regulatory  
580 regions in the neuron-specific enolase (NSE) promoter in mouse cerebellum in vivo.  
581 *Cerebellum* **16**, 913-922 (2017).
- 582 67. Konno, A., *et al.* Mutant ataxin-3 with an abnormally expanded polyglutamine chain disrupts  
583 dendritic development and metabotropic glutamate receptor signaling in mouse cerebellar  
584 Purkinje cells. *Cerebellum* **13**, 29-41 (2014).
- 585 68. Matsuzaki, Y., *et al.* Neurotropic Properties of AAV-PHP.B are shared among diverse inbred  
586 strains of mice. *Mol Ther* **27**, 700-704 (2019).
- 587 69. Sakitani, N., *et al.* Application of consistent massage-like perturbations on mouse calves and  
588 monitoring the resulting intramuscular pressure changes. *J Vis Exp* e59475 (2019).
- 589 70. Liu, C., De Luca, A., Rosso, A. & Talon, L. Darcy's law for yield stress fluids. *Phys Rev Lett*  
590 **122**, 245502 (2019).
- 591 71. Schildge, S., Bohrer, C., Beck, K. & Schachtrup, C. Isolation and culture of mouse cortical  
592 astrocytes. *J Vis Exp* e50079 (2013).
- 593 72. Umemura, S., *et al.* The Japanese Society of Hypertension guidelines for the management of  
594 hypertension (JSH 2019). *Hypertens Res* **42**, 1235-1481 (2019).

595

596 **Figures and figure legends**

**Fig. 1**

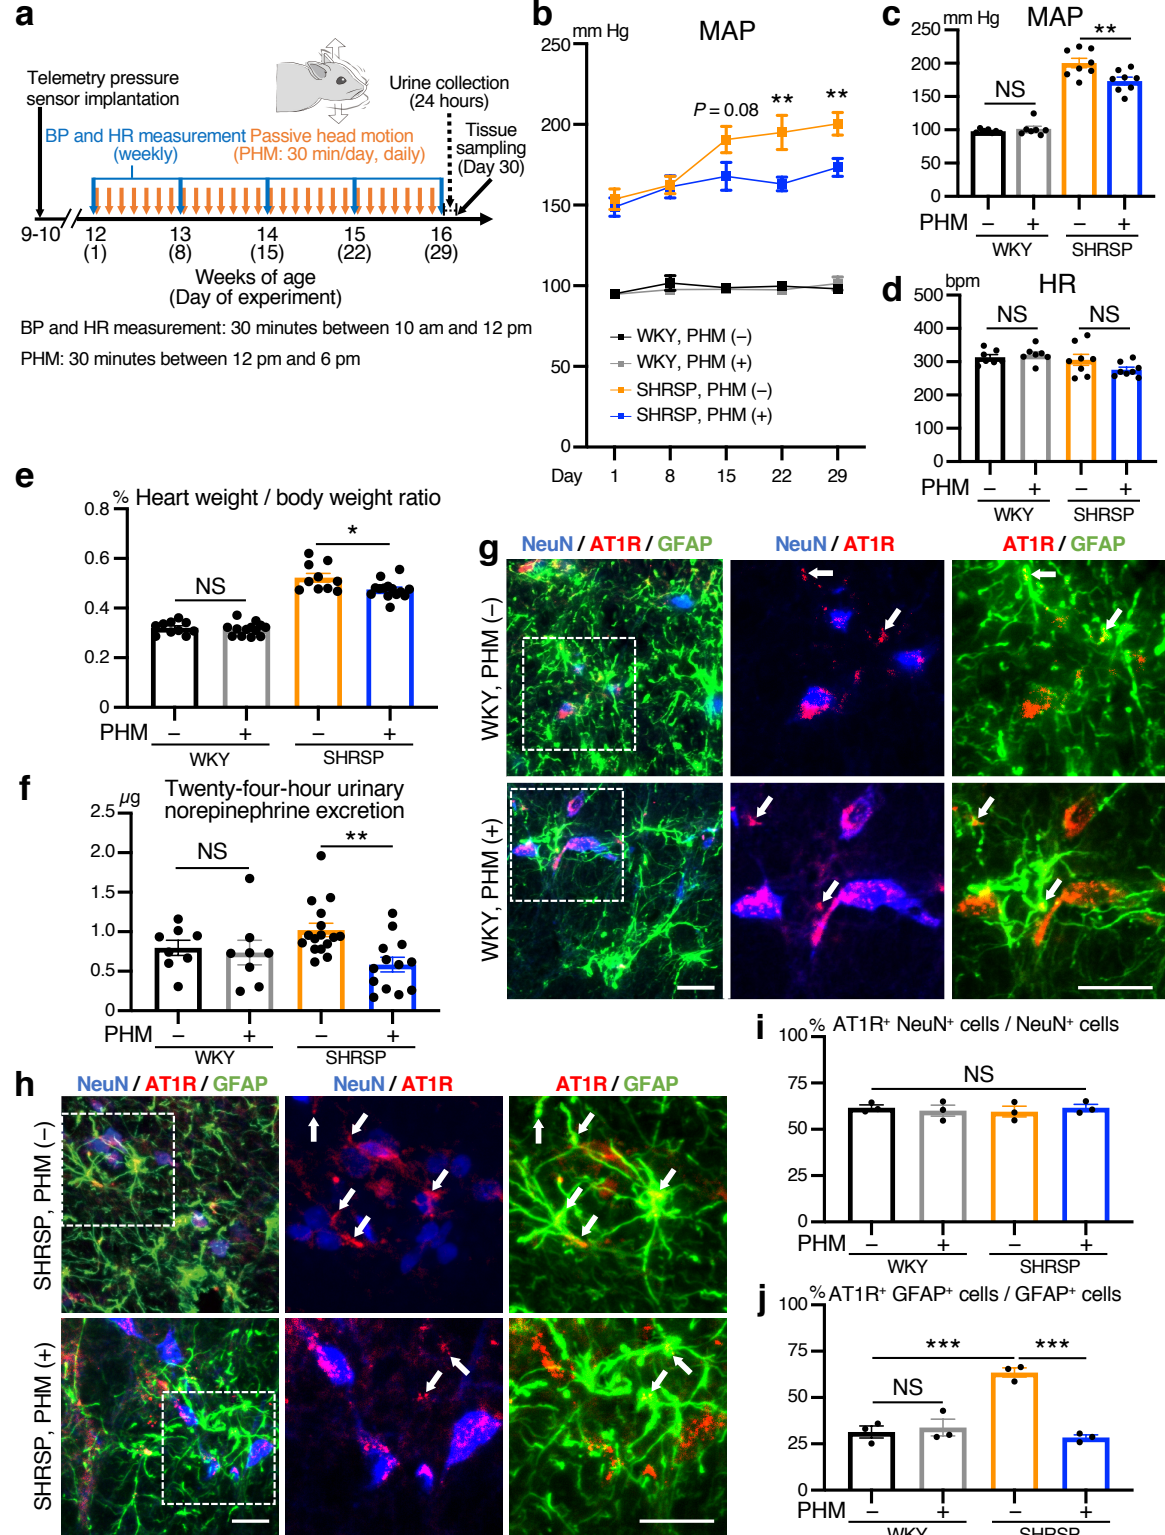

597

598 **Fig. 1 | Application of cyclical mechanical impact to the head by passive motion lowers the BP**

599 **in SHRSPs, and AT1R expression in their RVLM astrocytes. a**, Schematic representation of  
600 experimental protocol for analysis of the effects of PHM on BP in rats. **b,c**, Time courses (**b**) and  
601 values on Day 29 (**c**) of MAP of WKY rats and SHRSPs, subjected to either daily PHM or  
602 anesthesia only (**b**:  $P = 0.0814$  for Day15,  $P = 0.0052$  for Day 22, and  $P = 0.0046$  for Day 29. **c**:  $P$   
603 = 0.9739 for column 1 vs. 2 and  $P = 0.0046$  for column 3 vs. 4.  $n = 7$  rats for each group of WKY  
604 and  $n = 8$  rats for each group of SHRSP). **d**, HR values on Day 29 ( $P = 0.9650$  for column 1 vs. 2  
605 and  $P = 0.2362$  for column 3 vs. 4.  $n = 7$  rats for each group of WKY and  $n = 8$  rats for each group  
606 of SHRSP). **e**, Relative heart weight (heart weight / whole body weight) measured on Day 30 [ $P =$   
607 0.9866 for column 1 vs. 2 and  $P = 0.0152$  for column 3 vs. 4.  $n = 10$  rats for WKY, PHM (-);  $n = 13$   
608 rats for WKY, PHM (+);  $n = 10$  rats for SHRSP, PHM (-);  $n = 14$  rats for SHRSP, PHM (+)]. **f**,  
609 Twenty-four-hour (Day 29 to Day 30) urinary norepinephrine excretion [ $P = 0.9854$  for column 1  
610 vs. 2 and  $P = 0.0085$  for column 3 vs. 4.  $n = 8$  rats for each group of WKY;  $n = 16$  rats for SHRSP,  
611 PHM (-);  $n = 13$  rats for SHRSP, PHM (+)]. **g,h**, Micrographic images of anti-NeuN (blue), anti-  
612 GFAP (green) and anti-AT1R (red) immunostaining of the RVLM of WKY rats (**g**) and SHRSPs  
613 (**h**), either left sedentary (top) or subjected to PHM (bottom) under anesthesia (30 minutes/day, 28  
614 days). Higher magnification images (center and right) refer to the areas indicated by dotted  
615 rectangles in low magnification images (left). Arrows point to anti-AT1R immunosignals that  
616 overlap with anti-GFAP, but not anti-NeuN, immunosignals in merged images. Scale bars, 50  $\mu\text{m}$ .

617 Images are representative of three rats. **i,j**, Quantification of AT1R-positive neurons (**i**) and  
618 astrocytes (**j**) in the RVLM of WKY rats and SHRSPs, either left sedentary or subjected to PHM.  
619 Fifty NeuN-positive (NeuN<sup>+</sup>) cells and one hundred GFAP-positive (GFAP<sup>+</sup>) cells were analyzed  
620 for each rat (**i**:  $P = 0.7803$ . **j**:  $P = 0.9455$  for column 1 vs. 2,  $P = 0.0004$  for column 1 vs. 3, and  $P =$   
621  $0.0002$  for column 3 vs. 4.  $n = 3$  rats for each group). Data are presented as mean  $\pm$  s.e.m.  $*P < 0.05$ ;  
622  $**P < 0.01$ ;  $***P < 0.001$ ; NS, not significant; one-way ANOVA with Tukey's post hoc multiple  
623 comparisons test.

Extended Data Fig. 1

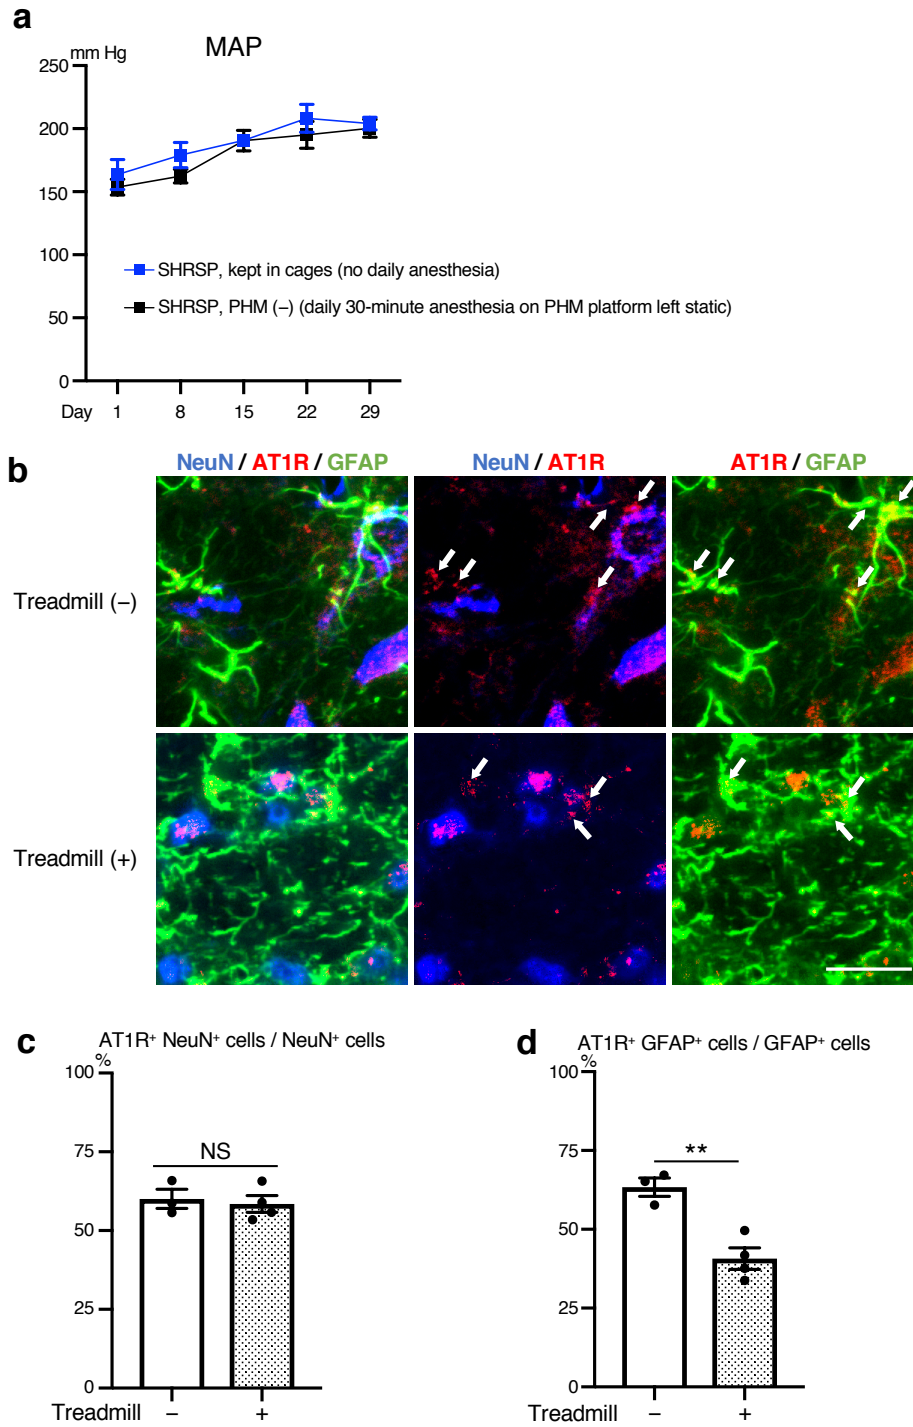

624

625 **Extended Data Fig. 1 | Daily anesthesia alone does not affect BP, and treadmill running**

626 **decreases AT1R expression in the RVLM astrocytes in SHRSPs. a, Time courses of MAP of**

627 SHRSPs either routinely kept in cages (no anesthesia) or subjected to daily anesthesia on the  
628 platform of PHM machine without turning on its switch [PHM (-)] [ $n = 6$  rats for no daily  
629 anesthesia and  $n = 8$  rats for PHM (-)]. **b**, Micrographic images anti-NeuN (blue), anti-GFAP  
630 (green) and anti-AT1R (red) immunostaining of the RVLM of SHRSPs, either placed in the static  
631 treadmill machine or subjected to treadmill running at the velocity of 20 m/minute (30 minutes/day,  
632 28 days). Arrows point to anti-AT1R immunosignals that overlap with anti-GFAP, but not anti-  
633 NeuN, immunosignals in merged images. Scale bar, 50  $\mu\text{m}$ . Images are representative of three or  
634 four rats. **c,d**, Quantification of AT1R-positive neurons (**c**) and astrocytes (**d**) in the RVLM of  
635 SHRSPs with or without 4-week treadmill running. Fifty NeuN<sup>+</sup> cells and one hundred GFAP<sup>+</sup> cells  
636 were analyzed for each rat [**c**:  $P = 0.7056$ . **d**:  $P = 0.0048$ .  $n = 3$  rats for treadmill (-) and  $n = 4$  rats  
637 for treadmill (+)]. Data are presented as mean  $\pm$  s.e.m.  $**P < 0.01$ ; NS, not significant, unpaired  
638 two-tailed Student's  $t$ -test.

Fig. 2

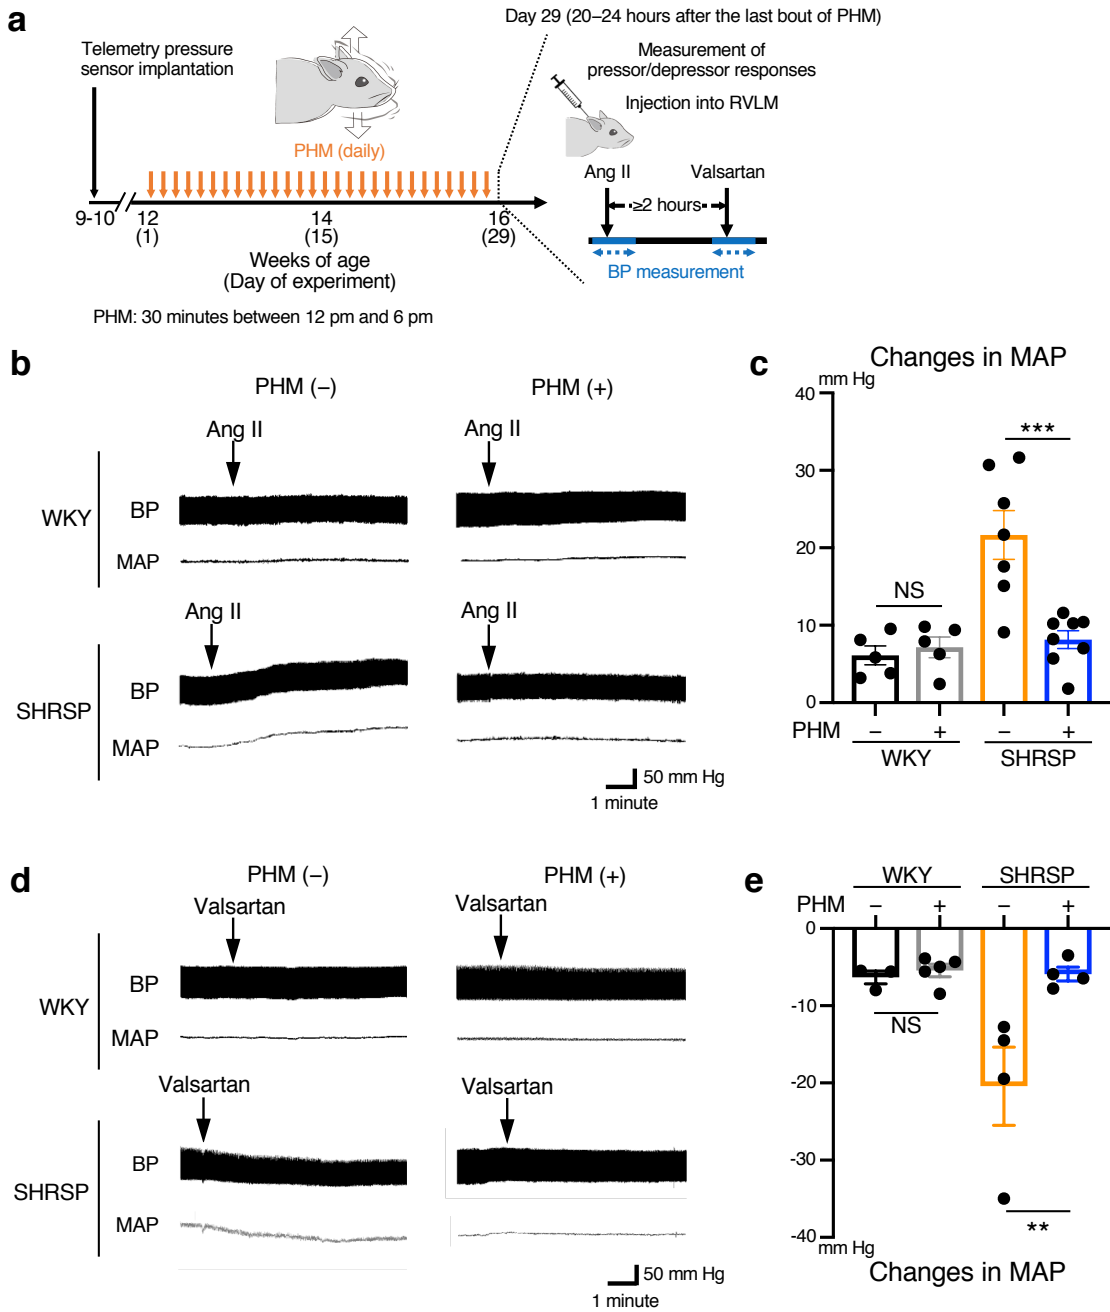

639

640 **Fig. 2 | PHM alleviates the sensitivity of RVLM in SHRSPs to Ang II or valsartan. a,**

641 Schematic representation of experimental protocol for analysis of the effects of PHM on the

642 sensitivity to Ang II or valsartan injected into unilateral RVLM. Ang II (100 pmol) was injected into

643 the unilateral RVLM of WKY rats and SHRSPs, either left sedentary (daily anesthesia) or subjected  
644 to PHM (30 minutes/day, 28 days), with their BP monitored under urethane anesthesia. Injection of  
645 valsartan (100 pmol) into the RVLM was conducted at least 2 hours after the injection of Ang II. **b**,  
646 Representative trajectories of BP (top in each panel) and MAP (bottom in each panel). Arrows point  
647 to the time of the initiation of RVLM injection of Ang II. **c**, Quantification of MAP change caused  
648 by Ang II injection [ $P = 0.9876$  for column 1 vs. 2 and  $P = 0.0003$  for column 3 vs. 4.  $n = 5$  rats for  
649 each group of WKY;  $n = 7$  rats for SHRSP, PHM (-);  $n = 8$  rats for SHRSP, PHM (+)]. **d,e**, Effects  
650 of RVLM injection of valsartan (100 pmol) examined as in **(b,c)** [**e**:  $P = 0.9953$  for column 1 vs. 2  
651 and  $P = 0.0099$  for column 3 vs. 4.  $n = 3$  rats for WKY, PHM (-);  $n = 5$  rats for WKY, PHM (+);  $n$   
652 = 4 rats for each group of SHRSP]. Data are presented as mean  $\pm$  s.e.m.  $**P < 0.01$ ;  $***P < 0.001$ ;  
653 NS, not significant; one-way ANOVA with Tukey's post hoc multiple comparisons test.



Fig. 3

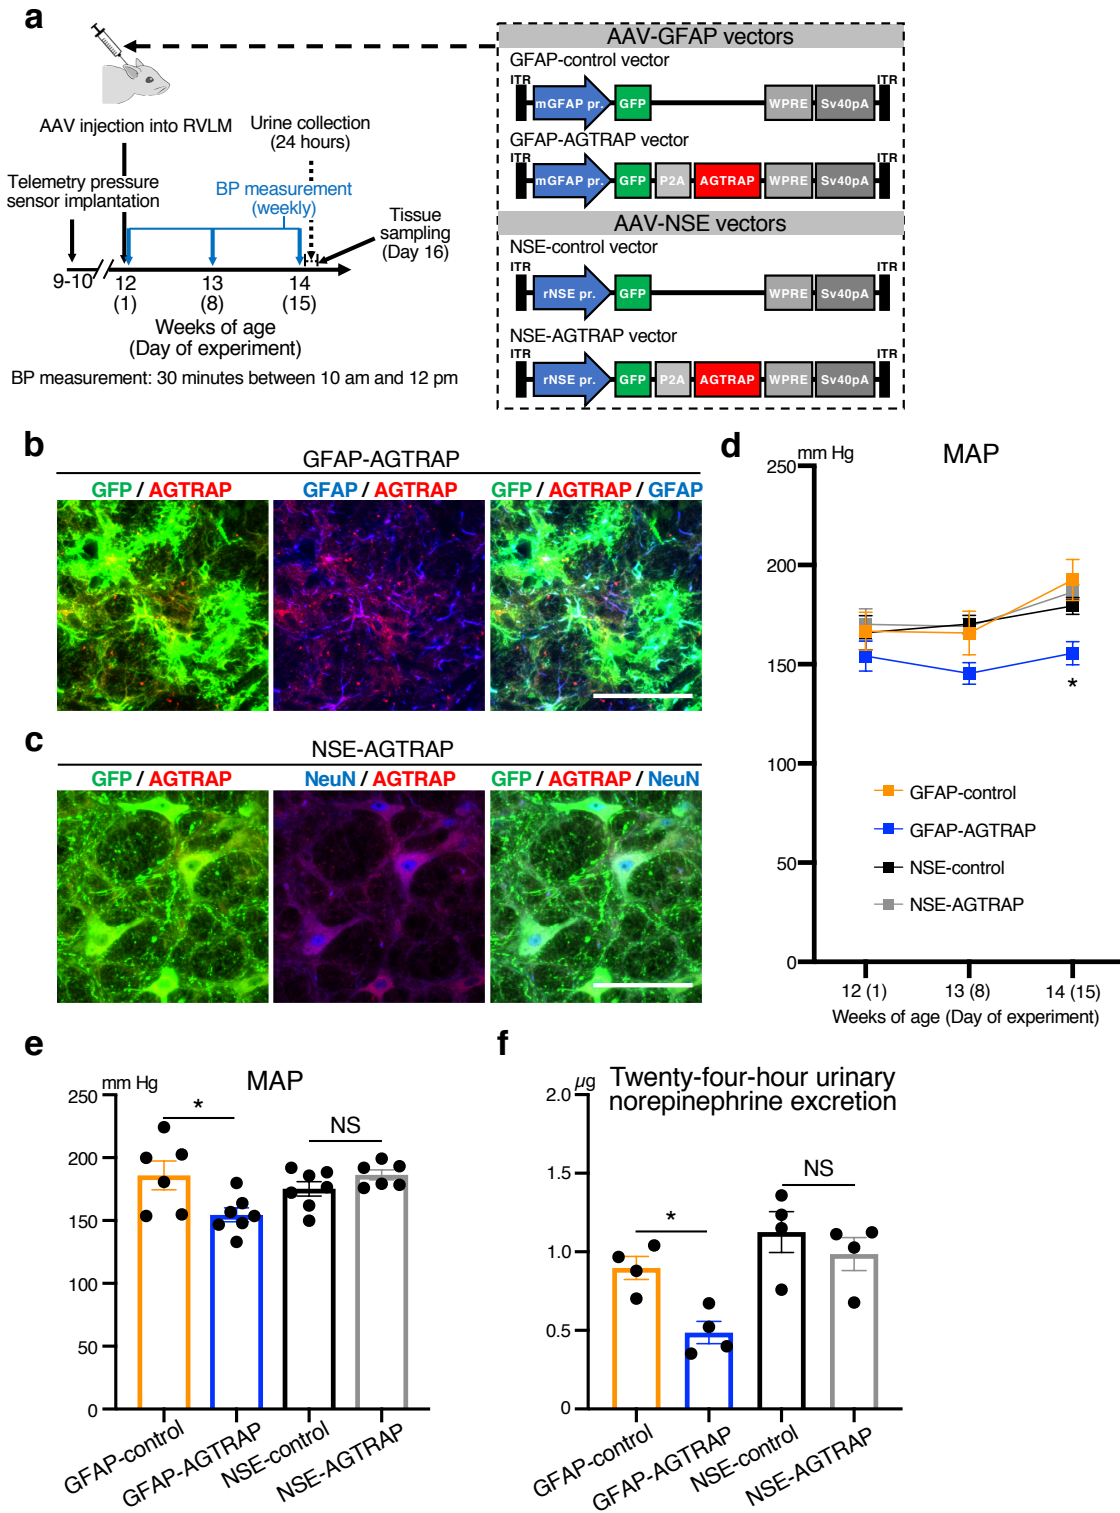

654

655 Fig. 3 | AAV-mediated expression of AGTRAP in RVLM astrocytes, but not neurons, lowers

656 **the BP in SHRSPs. a**, Schematic representation of experimental protocol for analysis of the effects  
657 of AAV-mediated transduction of RVLM astrocytes or neurons with AGTRAP gene. ITR; inverted  
658 terminal repeat. **b,c**, Astrocyte- (**b**) and neuron- (**c**) specific transgene expression by RVLM  
659 injection of AAV9 vectors. Micrographic images of GFP (green) and anti-GFAP (**b**) or anti-NeuN  
660 (**c**) immunostaining (blue) of RVLM of SHRSPs 15 days after the injection of AAV9 vectors  
661 indicated at the top of each panel. Scale bars, 50  $\mu$ m. Images are representative of three rats. **d-f**,  
662 Time courses (**d**) and values on Day 15 (**e**) of MAP (**d**:  $P = 0.0229$  for Day 14. **e**:  $P = 0.0229$  for  
663 column 1 vs. 2 and  $P = 0.6864$  for column 3 vs. 4.  $n = 6$  rats for GFAP-control;  $n = 7$  rats for  
664 GFAP-AGTRAP;  $n = 7$  rats for NSE-control;  $n = 6$  rats for NSE-AGTRAP), and 24-hour urinary  
665 norepinephrine excretion (**f**) ( $P = 0.0497$  for column 1 vs. 2 and  $P = 0.7455$  for column 3 vs. 4.  $n =$   
666 4 rats for each group) of SHRSPs subjected to RVLM injection of AAV9 vectors. Data are  
667 presented as mean  $\pm$  s.e.m.  $*P < 0.05$ ; NS, not significant, one-way ANOVA with Tukey's post hoc  
668 multiple comparisons test.

Extended Data Fig. 2

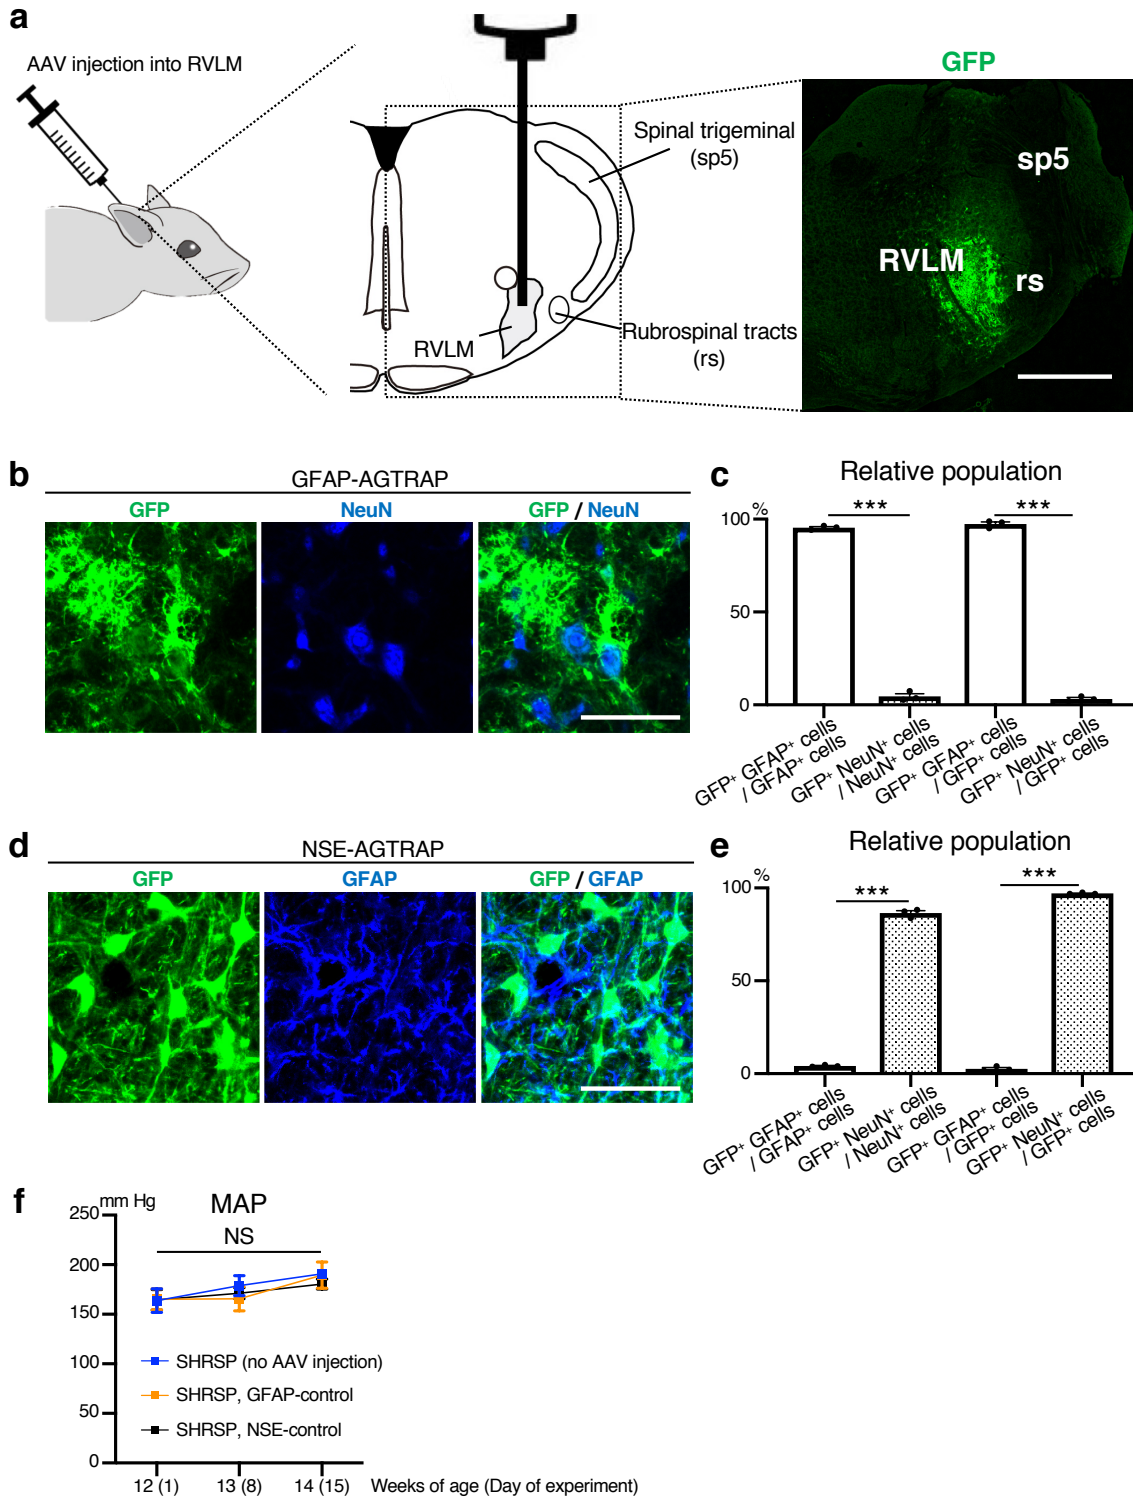

669

670 Extended Data Fig. 2 | AAV-mediated transduction of RVLM astrocytes or neurons in

671 **SHRSPs. a**, Schematic representation of injection of AAV9 vectors to RVLM. Micrographic image  
672 is representative of three rats analyzed in Fig. 3b (15 days after the RVLM injection of GFAP-  
673 AGTRAP vector). GFP-derived fluorescence indicates cells expressing the transgene. Scale bar, 1  
674 mm. **b,c**, Efficiency and specificity of astrocyte-specific expression of the transgene. **(b)**  
675 Micrographic images of GFP (green) and anti-NeuN immunostaining (blue) of RVLM of SHRSPs  
676 analyzed in Fig. 3b. Scale bar, 50  $\mu$ m. Images are representative of three rats. **(c)** Quantification of  
677 the efficiency and specificity of transgene expression. The relative populations (%) of GFP- GFAP-  
678 double positive (GFP<sup>+</sup> GFAP<sup>+</sup>) or GFP- NeuN-double positive (GFP<sup>+</sup> NeuN<sup>+</sup>) cells were calculated  
679 by referring their numbers to those of GFP<sup>+</sup>, GFAP<sup>+</sup> or NeuN<sup>+</sup> cells ( $P < 0.0001$  for column 1 vs. 2  
680 and  $P < 0.0001$  for column 3 vs. 4.  $n = 3$  rats for each group). **d,e**, Efficiency and specificity of  
681 neuron-specific expression of the transgene. **(d)** Micrographic images of GFP (green) and anti-  
682 GFAP immunostaining (blue) of RVLM of SHRSPs analyzed in Fig. 3c. Scale bar, 50  $\mu$ m. Images  
683 are representative of three rats. **(e)** The efficiency and specificity quantified as in **(c)** ( $P < 0.0001$  for  
684 column 1 vs. 2 and  $P < 0.0001$  for column 3 vs. 4.). **f**, BP in SHRSPs injected with control vectors.  
685 BP was measured and MAP was quantified as in Fig. 1b ( $P = 0.9803$  for Week 12,  $P = 0.5914$  for  
686 Week 13, and  $P = 0.4693$  for Week 14.  $n = 6$  rats for no AAV injection;  $n = 6$  rats for GFAP-control;  
687  $n = 7$  rats for NSE-control). The data for blue line are identical with those demonstrated with blue  
688 line in Extended Data Fig. 1a. Data are presented as mean  $\pm$  s.e.m. \*\*\* $P < 0.001$ ; NS, not

689 significant; unpaired two-tailed Student's *t*-test **(c,e)** or one-way ANOVA with Tukey's post hoc

690 multiple comparisons test **(f)**.

Fig. 4

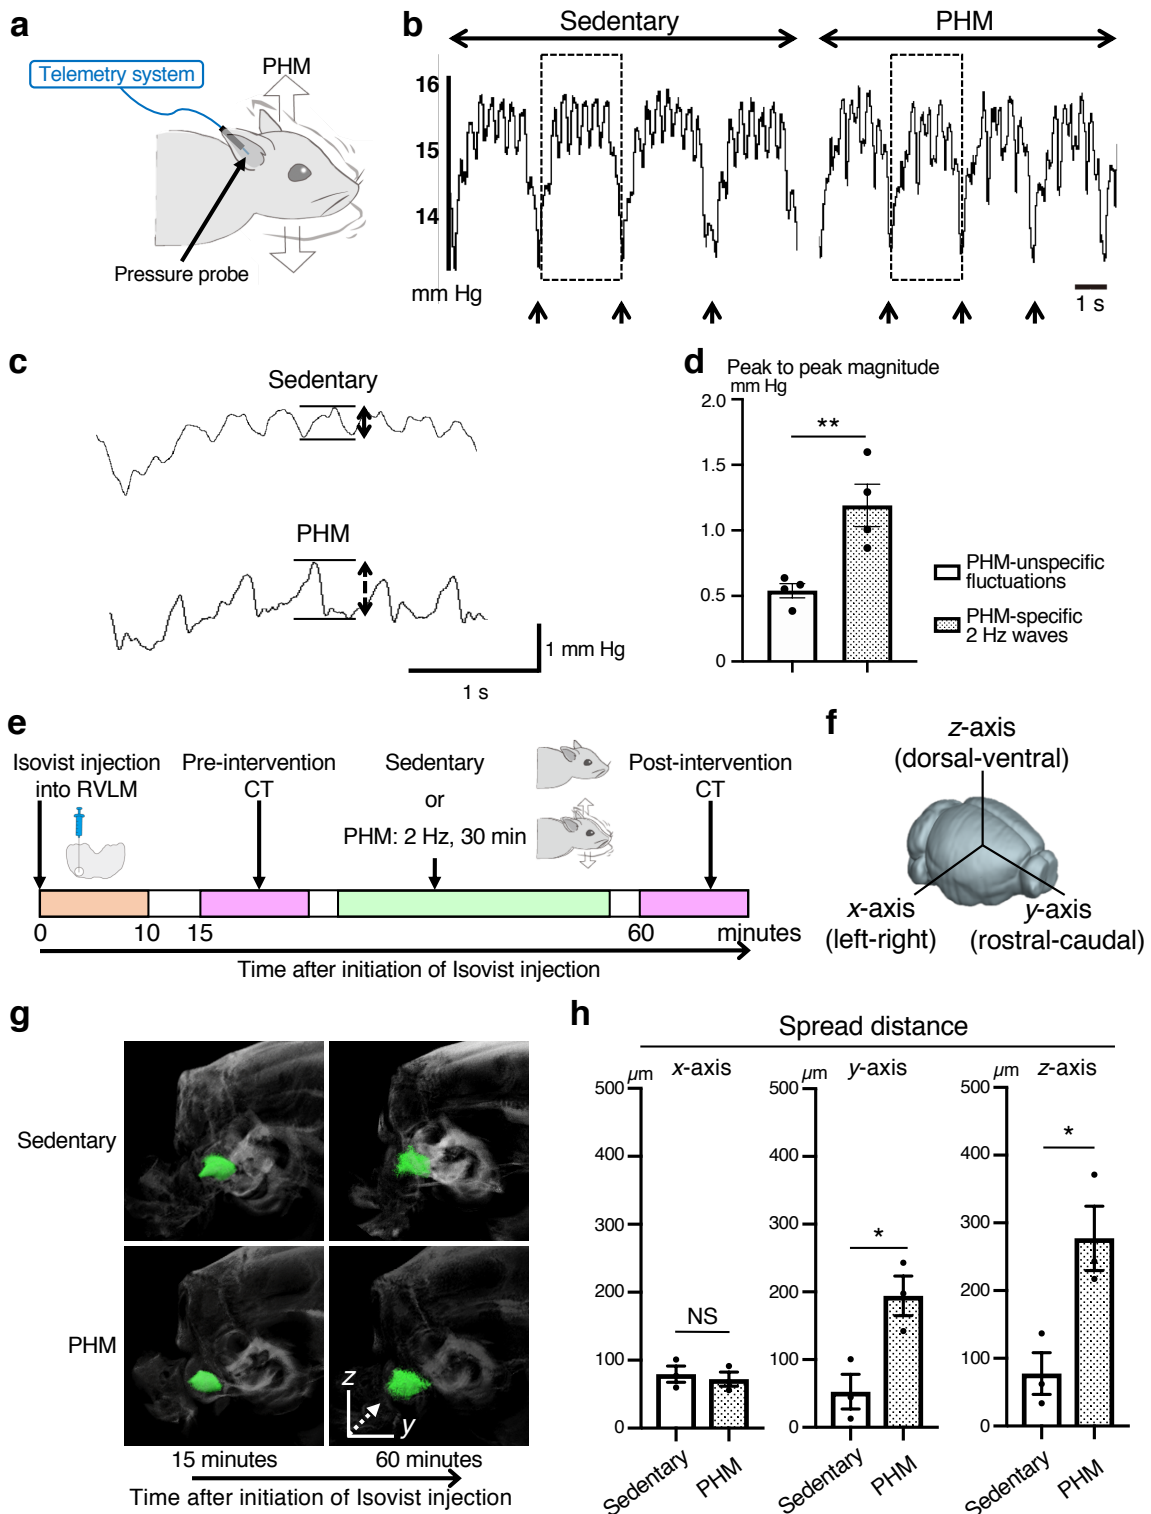

691

692 Fig. 4 | PHM generates pressure waves of low amplitude, but facilitates interstitial fluid

693 **movement (flow) in rat RVLM. a**, Schematic representation of pressure measurement in rat  
694 RVLM. **b**, Representative pressure waves recorded in rat RVLM during sedentary condition and  
695 PHM. Arrows point to the time of transition from inhalation to exhalation detected by simultaneous  
696 respiration monitoring. Scale bar, 1 s. Images are representative of three independent experiments  
697 with similar results. **c**, Respiration-unsynchronized pressure changes. Respiration-synchronized  
698 pressure waves indicated by dotted rectangles in **(b)** are presented with high magnification. Right-  
699 angled scale bar, 1 s / 1 mm Hg. Note that 2-Hz pressure waves indicated by a two-headed dotted  
700 line arrow were specifically generated during PHM. **d**, Magnitude of PHM-specific and -unspecific  
701 pressure changes unsynchronized with respiration. Peak to peak magnitudes indicated by two-  
702 headed arrows in **(c)** were quantified ( $P = 0.0089$ .  $n = 4$  rats for each group, 10 segments analyzed  
703 for each rat). **e**, Schematic representation of experimental protocol for  $\mu$ CT analysis of Isovist  
704 injected in rat RVLM. **f**, Definition of  $x$ -(left-right),  $y$ -(rostral-caudal), and  $z$ -(dorsal-ventral) axes  
705 used in this study. **g**, Representative Isovist spreading presented on X-ray images. Isovist clusters  
706 are indicated by green. Images are representative of three rats. A dotted line arrow indicates the  
707 main direction of spreading in this sample. **h**, Quantification of Isovist spreading along each axis  
708 (left chart:  $P = 0.6666$ . middle chart:  $P = 0.0218$ . right chart:  $P = 0.0244$ .  $n = 3$  rats for each group).  
709 Data are presented as mean  $\pm$  s.e.m. \* $P < 0.05$ ; \*\* $P < 0.01$ ; NS, not significant, unpaired two-tailed  
710 Student's  $t$ -test.

Supplementary Table 1

**a**

| Property                                                                              | Value  |
|---------------------------------------------------------------------------------------|--------|
| Pressure changes ( $\Delta P$ ; mmHg)                                                 | 1.19   |
| Viscosity ( $\mu$ ; mPa·s)                                                            | 1–20 # |
| Spread distance along x-axis per each PHM cycle ( $\Delta x$ ; $\mu\text{m}$ )        | -0.002 |
| Spread distance along y-axis per each PHM cycle ( $\Delta y$ ; $\mu\text{m}$ )        | 0.039  |
| Spread distance along z-axis per each PHM cycle ( $\Delta z$ ; $\mu\text{m}$ )        | 0.055  |
| Velocity of interstitial fluid flow along x-axis ( $u_{\infty,x}$ ; $\mu\text{m/s}$ ) | -0.004 |
| Velocity of interstitial fluid flow along y-axis ( $u_{\infty,y}$ ; $\mu\text{m/s}$ ) | 0.079  |
| Velocity of interstitial fluid flow along z-axis ( $u_{\infty,z}$ ; $\mu\text{m/s}$ ) | 0.111  |

**b**

FSS ( $\tau_x$ ) along x-axis at the cell surface:

$$\tau_x = \frac{\mu u_{\infty,x}}{\sqrt{K_{p,x}}}$$

$$K_{p,x} = \frac{\mu u_{\infty,x} \Delta x}{\Delta P}$$

, where  $K_{p,x}$  is the Darcy permeability of brain tissue along x-axis.

The shear stresses along y- and z-axes can be calculated in a similar manner.

When the values listed in **a** are introduced in these equations, the magnitude of FSS is estimated as 0.59–2.64 Pa.

711

712 **Supplementary Table 1 | Simulative calculation of the magnitude of PHM-generated FSS on**

713 **rat RVLM cells. a**, Values referenced for simulative calculation of the magnitude of FSS that PHM

714 generated in rat RVLM. All referenced values except viscosity (marked with #) were drawn from



715 analyses with IBP measurement and Isovist-enhanced  $\mu$ CT scanning (Fig. 4d,h). The property of  
716 interstitial fluid viscosity was referenced from previous studies<sup>57-59</sup>. **b**, Calculation of the magnitude  
717 of FSS generated by PHM. FSS ( $\tau$ ) at the cell surface can be calculated as reported previously<sup>60</sup>.

Fig. 5

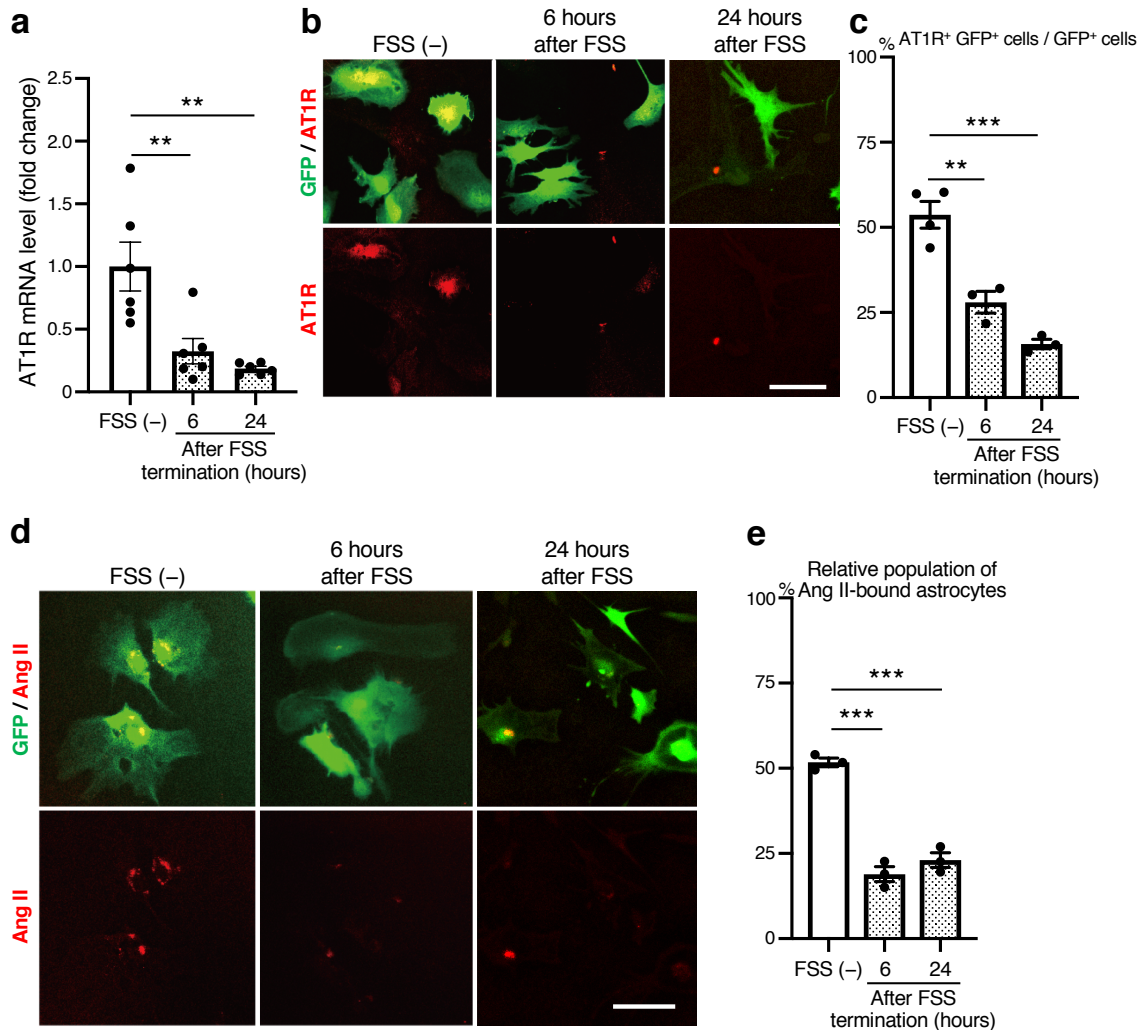

718

719 **Fig. 5 | FSS on cultured astrocytes decreases their AT1R expression and Ang II-binding**

720 **potential in vitro.** a–c, AT1R expression in cultured astrocytes with or without exposure to FSS.

721 Astrocytes prepared from astrocyte-GFP mice, either left unexposed or exposed to pulsatile FSS

722 (average 0.7 Pa, 0.5 Hz, 30 minutes) were analyzed 6 and 24 hours after the cessation of 30-minute

723 FSS application. (a) AT1R mRNA expression levels normalized against GAPDH expression and

724 scaled as the mean value from control samples (cells left unexposed to FSS) set as 1 ( $P = 0.0050$  for

725 column 1 vs. 2 and  $P = 0.0011$  for column 1 vs. 3.  $n = 6$ ). **(b)** Microscopic images of anti-AT1R  
726 (red) and anti-GFP (green) immunostaining. Images are representative of three or four independent  
727 experiments with similar results. Scale bar, 50  $\mu\text{m}$ . **(c)** Relative population of AT1R- GFP-double  
728 positive (AT1R<sup>+</sup> GFP<sup>+</sup>) cells were quantified as a ratio to total GFP-positive (GFP<sup>+</sup>) cells in each  
729 sample [ $P = 0.0021$  for column 1 vs. 2 and  $P = 0.0002$  for column 1 vs. 3. >100 GFP-positive cells  
730 were analyzed in each sample;  $n = 4$  for FSS (-),  $n = 3$  for 6 and 24 hours after FSS]. **d,e**, Effect of  
731 FSS on astrocytes' Ang II-binding potential. Cultured astrocytes were either left unexposed or  
732 exposed to FSS as in **(a-c)**. Six and twenty-four hours after the cessation of 30-minute FSS  
733 application, cells were subjected to fluorescent Ang II binding assay. **(d)** Microscopic images  
734 representative of three independent experiments with similar results. Scale bar, 50  $\mu\text{m}$ . **(e)** GFP-  
735 positive cells with punctate red fluorescence (TAMRA-Ang II-bound astrocytes) were quantified as  
736 a ratio (%) to total GFP-positive cells in each sample ( $P < 0.0001$  for column 1 vs. 2 and  $P = 0.0001$   
737 for column 1 vs. 3. 100 GFP-positive cells were analyzed in each sample;  $n = 3$  for each group).  
738 Data are presented as mean  $\pm$  s.e.m.  $**P < 0.01$ ,  $***P < 0.001$ , one-way ANOVA with Tukey's post  
739 hoc multiple comparisons test.

Extended Data Fig. 3

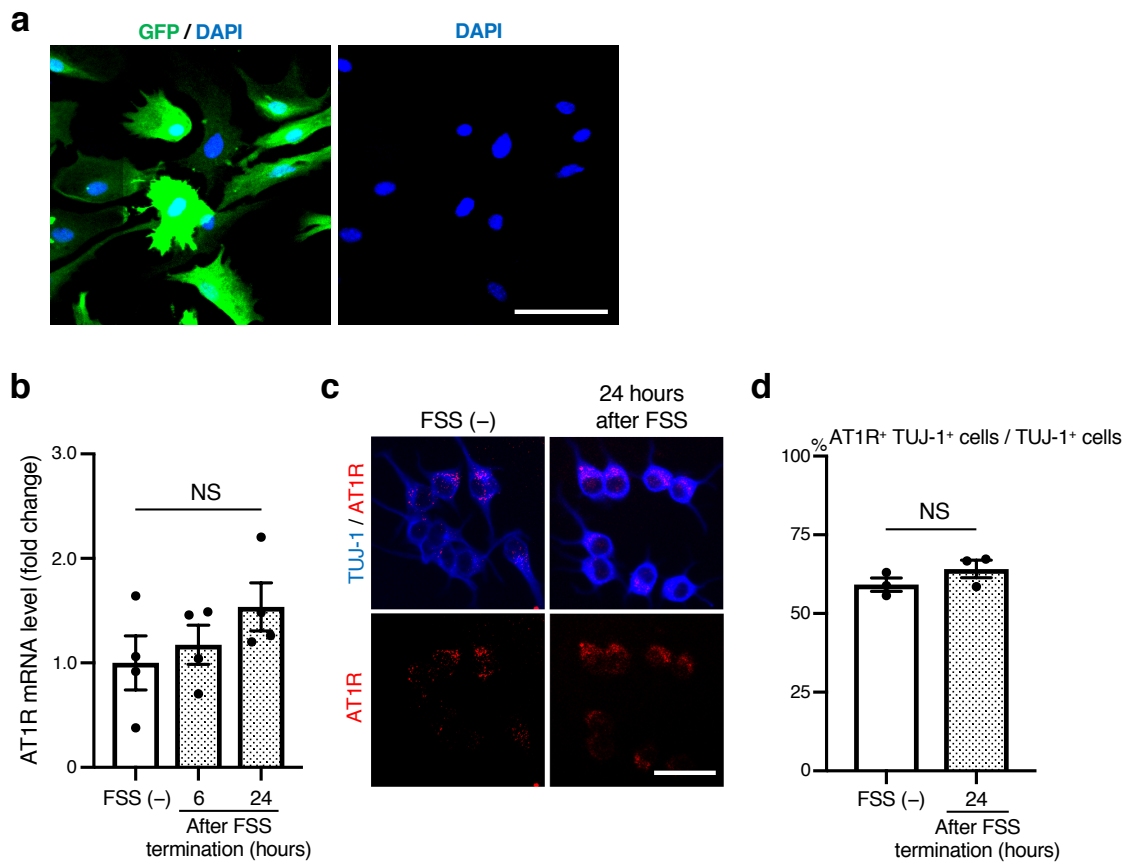

740

741 **Extended Data Fig. 3 | Preparation of astrocyte-enriched primary culture, and lack of**

742 **decreasing effect of FSS on AT1R expression in cultured neuronal cells. a**, Representative

743 micrographic image of anti-GFP immunostaining (green) and DAPI staining (blue) of astrocyte-

744 enriched culture prepared from astrocyte-GFP mice. Scale bar, 50  $\mu$ m. Note that most of the cells

745 are GFP-positive. **b-d**, Effects of FSS on AT1R expression in Neuro2A cells analyzed as in Fig.

746 5a-c. **(b)** AT1R mRNA expression levels ( $P = 0.2834$ ,  $n = 4$ ). **(c)** Micrographic images

747 representative of three independent experiments with similar results. Scale bar, 50  $\mu$ m. **(d)** Relative

748 population of AT1R- TUJ-1-double positive (AT1R<sup>+</sup> TUJ-1<sup>+</sup>) cells quantified as a ratio to total TUJ-

749 1-positive (TUJ-1<sup>+</sup>) cells in each sample ( $P = 0.2308$ . >100 TUJ-1-positive cells were analyzed in  
750 each sample;  $n = 3$ ). Data are presented as mean  $\pm$  s.e.m. NS, not significant, one-way ANOVA with  
751 Tukey's post hoc multiple comparisons test **(b)** or unpaired two-tailed Student's *t*-test **(d)**.

Fig. 6

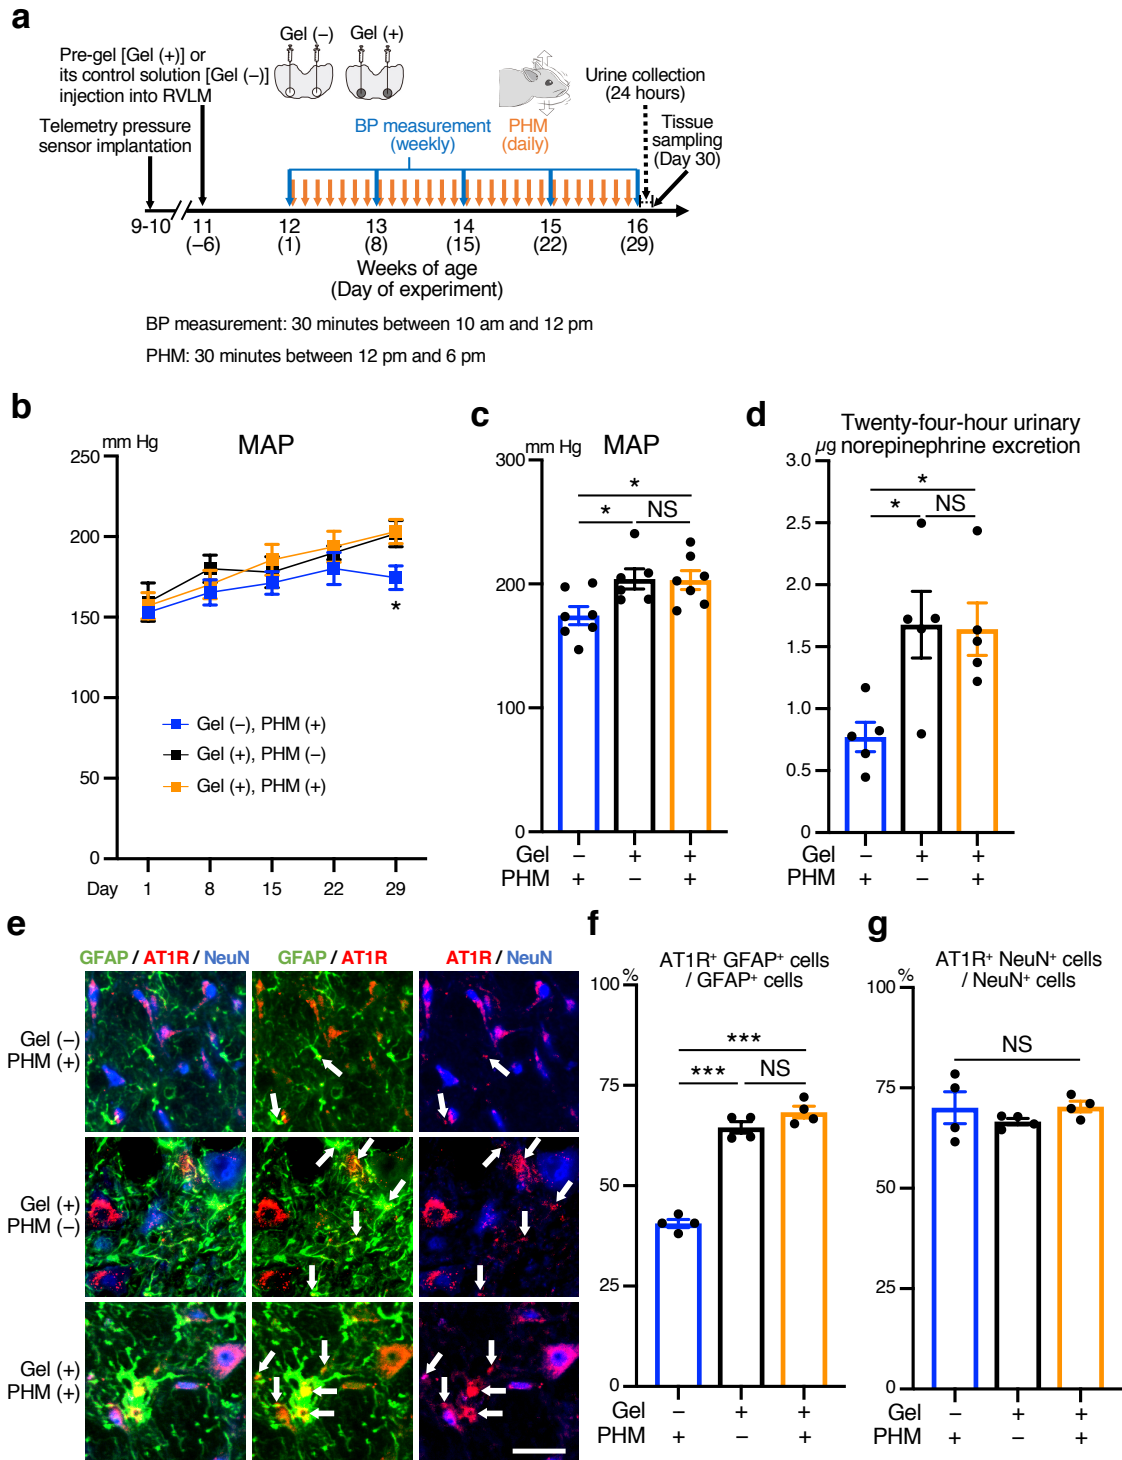

752

753 **Fig. 6 | Hydrogel introduction eliminates decreasing effects of PHM on BP and AT1R**

754 **expression in the RVLM astrocytes in SHRSPs. a, Schematic representation of experimental**

755 protocol for analysis of the effects of PHM with and without PEG hydrogel introduction in bilateral  
756 RVLMs of SHRSPs. PHM was applied daily for consecutive 28 days. **b–d**, Time courses (**b**) and  
757 values on Day 29 (**c**) of MAP, and 24-hour urinary norepinephrine excretion (**d**) of SHRSPs,  
758 subjected to various combinations of daily PHM application and hydrogel introduction in bilateral  
759 RVLMs. Note the absence of significant difference in BP (**b,c**) and urinary norepinephrine excretion  
760 (**d**) of SHRSPs with hydrogel introduced RVLMs [Gel (+)] between with and without PHM [**b**:  $P =$   
761  $0.0372$  for Day 29. **c**:  $P = 0.0387$  for column 1 vs. 2,  $P = 0.0372$  for column 1 vs. 3, and  $P = 0.9959$   
762 for column 2 vs. 3.  $n = 7$  rats for Gel (–), PHM (+) and for Gel (+), PHM (+);  $n = 6$  rats for Gel (+),  
763 PHM (–); **d**:  $P = 0.0247$  for column 1 vs. 2,  $P = 0.0307$  for column 1 vs. 3, and  $P = 0.9920$  for  
764 column 2 vs. 3.  $n = 5$  rats for each group]. **e**, Micrographic images of anti-GFAP (green), anti-AT1R  
765 (red), and anti-NeuN (blue) immunostaining of the RVLM in SHRSPs subjected to various  
766 combinations of hydrogel introduction in bilateral RVLMs and 4-week PHM application. Arrows  
767 point to anti-AT1R immunosignals that overlap with anti-GFAP, but not anti-NeuN, immunosignals  
768 in merged images. Scale bar, 50  $\mu\text{m}$ . Images are representative of four rats. **f,g**, Quantification of  
769 AT1R-positive astrocytes (**f**) and neurons (**g**) in the RVLM. Note the absence of significant  
770 difference in the ratio of AT1R-positive astrocytes of SHRSPs with hydrogel introduced RVLMs  
771 [Gel (+)] between with and without PHM (**f**, columns 2 and 3). Fifty NeuN<sup>+</sup> cells and one hundred  
772 GFAP<sup>+</sup> cells were analyzed for each rat (**f**:  $P < 0.0001$  for column 1 vs. 2,  $P < 0.0001$  for column 1

773 vs. 3, and  $P = 0.1597$  for column 2 vs. 3. **g**:  $P = 0.5182$ .  $n = 4$  rats for each group). Data are  
774 presented as mean  $\pm$  s.e.m.  $*P < 0.05$ ;  $***P < 0.001$ ; NS, not significant, one-way ANOVA with  
775 Tukey's post hoc multiple comparisons test.



Extended Data Fig. 4

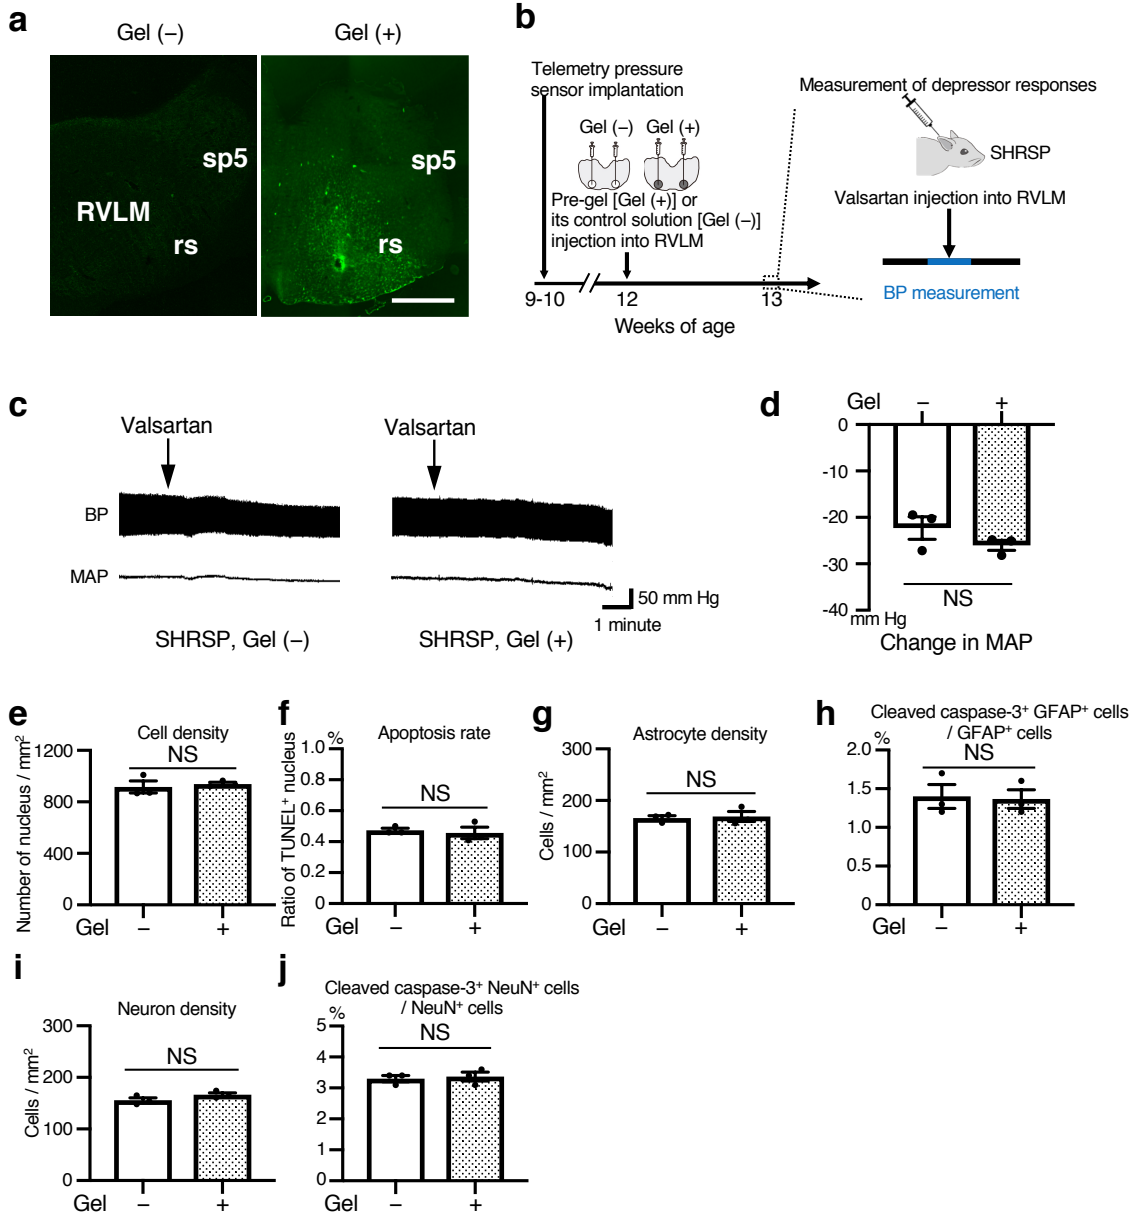

776

777 **Extended Data Fig. 4 | Hydrogel introduction in the RVLM does not affect the depressor**

778 **response to valsartan or survival/apoptosis of RVLM astrocytes and neurons in SHRSPs. a,**

779 Introduction of PEG hydrogel in rat RVLM. Twenty-four hours after the injection of control

780 ungelatable fluorescent PEG solution (left) or 1 week after the injection of pre-gel fluorescent PEG

781 solution (right), brainstem samples were prepared. Coronal-section images representative of three  
782 rats with similar results are shown. Scale bar, 1 mm. **b**, Schematic representation of experimental  
783 protocol. One week after the injection of pre-gel PEG solution or its ungelatable control, depressor  
784 response was analyzed as in Fig. 2. **c,d**, Representative trajectories (**c**) and quantification (**d**) of BP  
785 descent upon valsartan injection to the RVLM of SHRSPPs with or without hydrogel introduction (**d**:  
786  $P = 0.2342$ .  $n = 3$  rats for each group). **e–j**, Effects of hydrogel introduction on survival/apoptosis  
787 of RVLM cells in SHRSPPs. Rat RVLM sections prepared in the experiments for Fig. 6e–g [PHM  
788 (+), Gel (–) and PHM (+), Gel (–)] were subjected to TUNEL assay (**e,f**), or combinations of anti-  
789 GFAP, anti-NeuN and anti-cleaved caspase-3 immunostaining (**g–j**). DAPI-positive nuclei (**e**),  
790 GFAP- (**g**) or NeuN- (**i**) positive cells were counted, and the relative populations of cells doubly  
791 positive for indicated combinations of TUNEL (**f**) and cleaved caspase-3 (**h,j**) were quantified. Each  
792 value represents an average from five images of 1 x 1-mm area analyzed for each rat (**e**:  $P = 0.6518$ .  
793 **f**:  $P = 0.6943$ . **g**:  $P = 0.7938$ . **h**:  $P = 0.8722$ . **i**:  $P = 0.1679$ . **j**:  $P = 0.7247$ .  $n = 3$  rats for each group).  
794 Data are presented as mean  $\pm$  s.e.m. NS, not significant; unpaired two-tailed Student's *t*-test.

Fig. 7

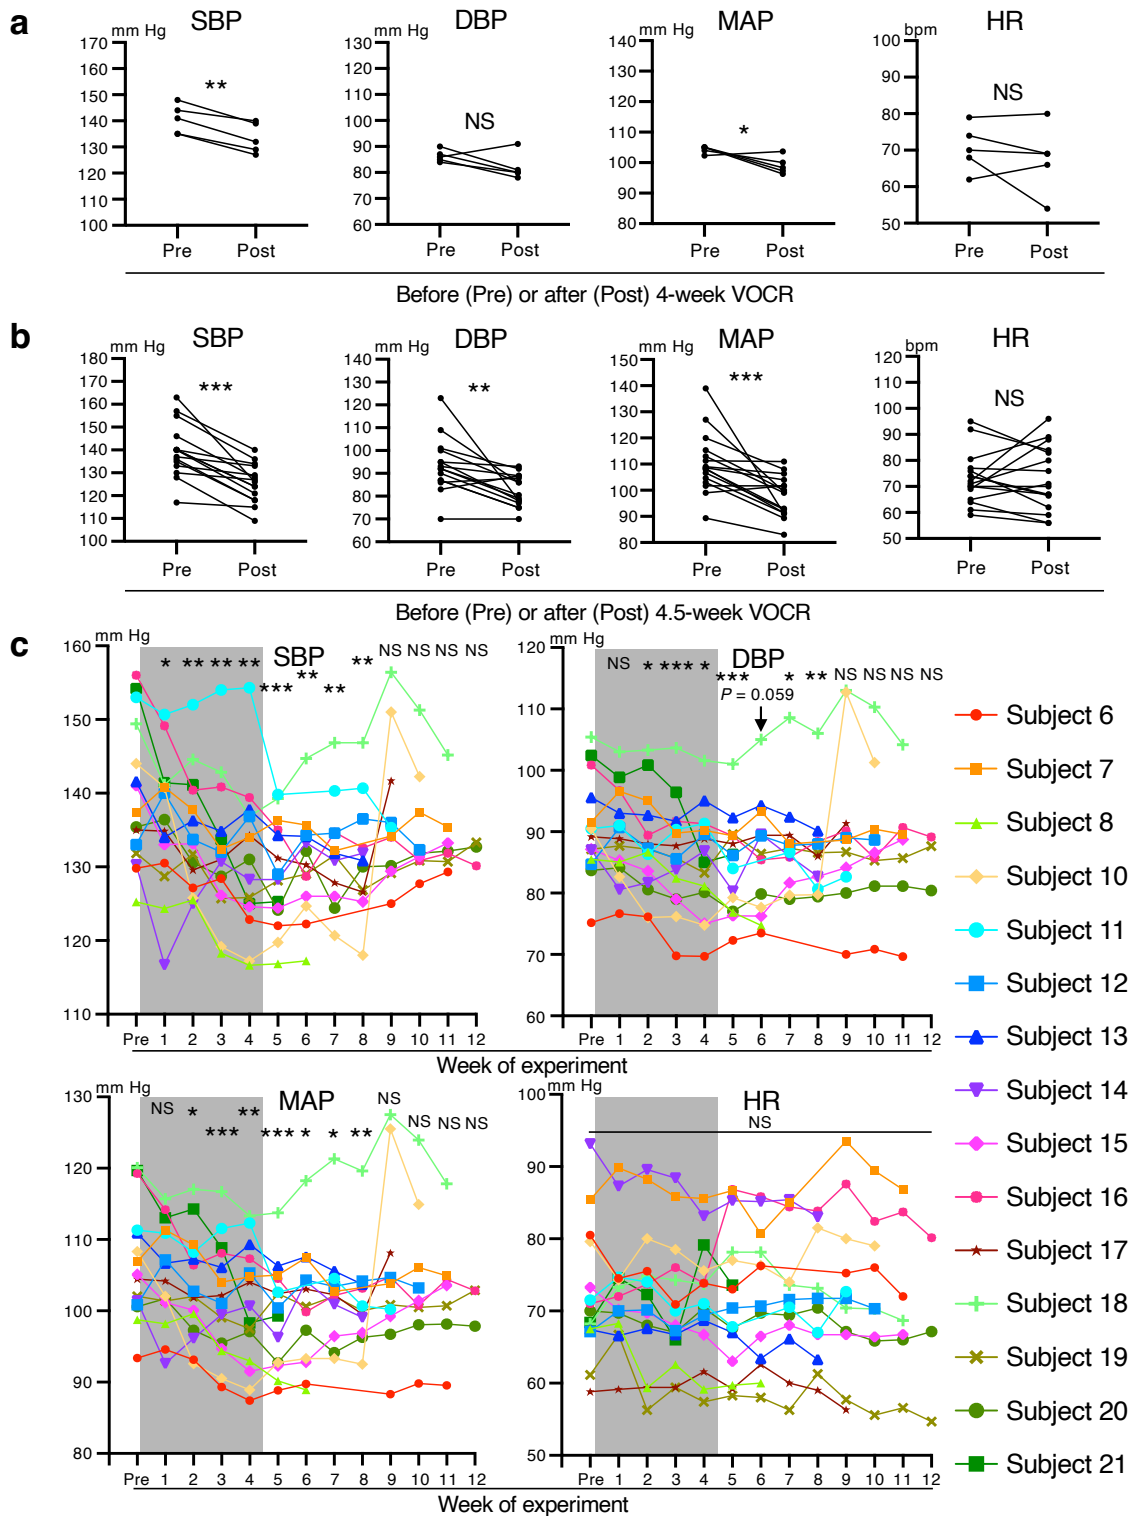

795

796 Fig. 7 | VOCCR has an antihypertensive effect on hypertensive adult humans. a, BP and HR

797 “value of the day”s immediately before and after 4-week VOQR in the study of protocol 1 (SBP:  $P$   
798 = 0.0018. DBP:  $P = 0.1509$ . MAP:  $P = 0.0459$ . HR:  $P = 0.3900$ .  $n = 5$ ). **b**, BP and HR “value of the  
799 week”s immediately before and after 4.5-week VOQR in the study of protocol 2 (SBP:  $P < 0.0001$ .  
800 DBP:  $P = 0.0031$ . MAP:  $P = 0.0009$ . HR:  $P = 0.9817$ .  $n = 15$ ). **c**, Subject number-corresponding  
801 trajectories and statistical analysis of BP and HR in the study of protocol 2. Gray-shaded rectangles  
802 indicate the VOQR intervention periods (4.5 weeks). The colors and symbols of individual lines  
803 correspond to those of individual subject numbers listed on the right, excluding subject 9 (see  
804 Supplementary Table 2). Each “value of the week” was statistically compared with that of the week  
805 immediately before the initiation of VOQR intervention (SBP:  $P = 0.0293$  for Pre vs. Week 1,  $P =$   
806 0.00228 for Pre vs. Week 2,  $P = 0.0013$  for Pre vs. Week 3,  $P = 0.0035$  for Pre vs. Week 4,  $P =$   
807 0.0002 for Pre vs. Week 5,  $P = 0.0078$  for Pre vs. Week 6,  $P = 0.0035$  for Pre vs. Week 7,  $P =$   
808 0.0075 for Pre vs. Week 8,  $P = 0.2132$  for Pre vs. Week 9,  $P = 0.1314$  for Pre vs. Week 10,  $P =$   
809 0.0973 for Pre vs. Week 11, and  $P = 0.3993$  for Pre vs. Week 12. DBP:  $P = 0.3022$  for Pre vs. Week  
810 1,  $P = 0.0436$  for Pre vs. Week 2,  $P = 0.0010$  for Pre vs. Week 3,  $P = 0.0100$  for Pre vs. Week 4,  $P =$   
811 0.0006 for Pre vs. Week 5,  $P = 0.0599$  for Pre vs. Week 6,  $P = 0.0488$  for Pre vs. Week 7,  $P =$   
812 0.0096 for Pre vs. Week 8,  $P = 0.9346$  for Pre vs. Week 9,  $P = 0.7850$  for Pre vs. Week 10,  $P =$   
813 0.0769 for Pre vs. Week 11, and  $P = 0.3137$  for Pre vs. Week 12. MAP:  $P = 0.1075$  for Pre vs. Week  
814 1,  $P = 0.0132$  for Pre vs. Week 2,  $P = 0.0008$  for Pre vs. Week 3,  $P = 0.0063$  for Pre vs. Week 4,  $P =$

815 0.0003 for Pre vs. Week 5,  $P = 0.0251$  for Pre vs. Week 6,  $P = 0.0136$  for Pre vs. Week 7,  $P =$   
816 0.0071 for Pre vs. Week 8,  $P = 0.6795$  for Pre vs. Week 9,  $P = 0.4295$  for Pre vs. Week 10,  $P =$   
817 0.0704 for Pre vs. Week 11, and  $P = 0.3662$  for Pre vs. Week 12. HR:  $P = 0.6287$  for Pre vs. Week  
818 1,  $P = 0.7840$  for Pre vs. Week 2,  $P = 0.1573$  for Pre vs. Week 3,  $P = 0.5380$  for Pre vs. Week 4,  $P =$   
819 0.7331 for Pre vs. Week 5,  $P = 0.6995$  for Pre vs. Week 6,  $P = 0.9110$  for Pre vs. Week 7,  $P =$   
820 0.9875 for Pre vs. Week 8,  $P = 0.5866$  for Pre vs. Week 9,  $P = 0.9566$  for Pre vs. Week 10,  $P =$   
821 0.6487 for Pre vs. Week 11, and  $P = 0.9905$  for Pre vs. Week 12.  $n = 15$  for Pre and Weeks 1 to 5,  $n$   
822 = 13 for Week 6,  $n = 12$  for Week 7,  $n = 11$  for Weeks 8 and 9,  $n = 9$  for Week 10,  $n = 7$  for Week  
823 11,  $n = 3$  for Week 12).  $*P < 0.05$ ;  $**P < 0.01$ ;  $***P < 0.001$ ; NS, not significant, paired two-tailed  
824 Student's *t*-test.

Extended Data Fig. 5

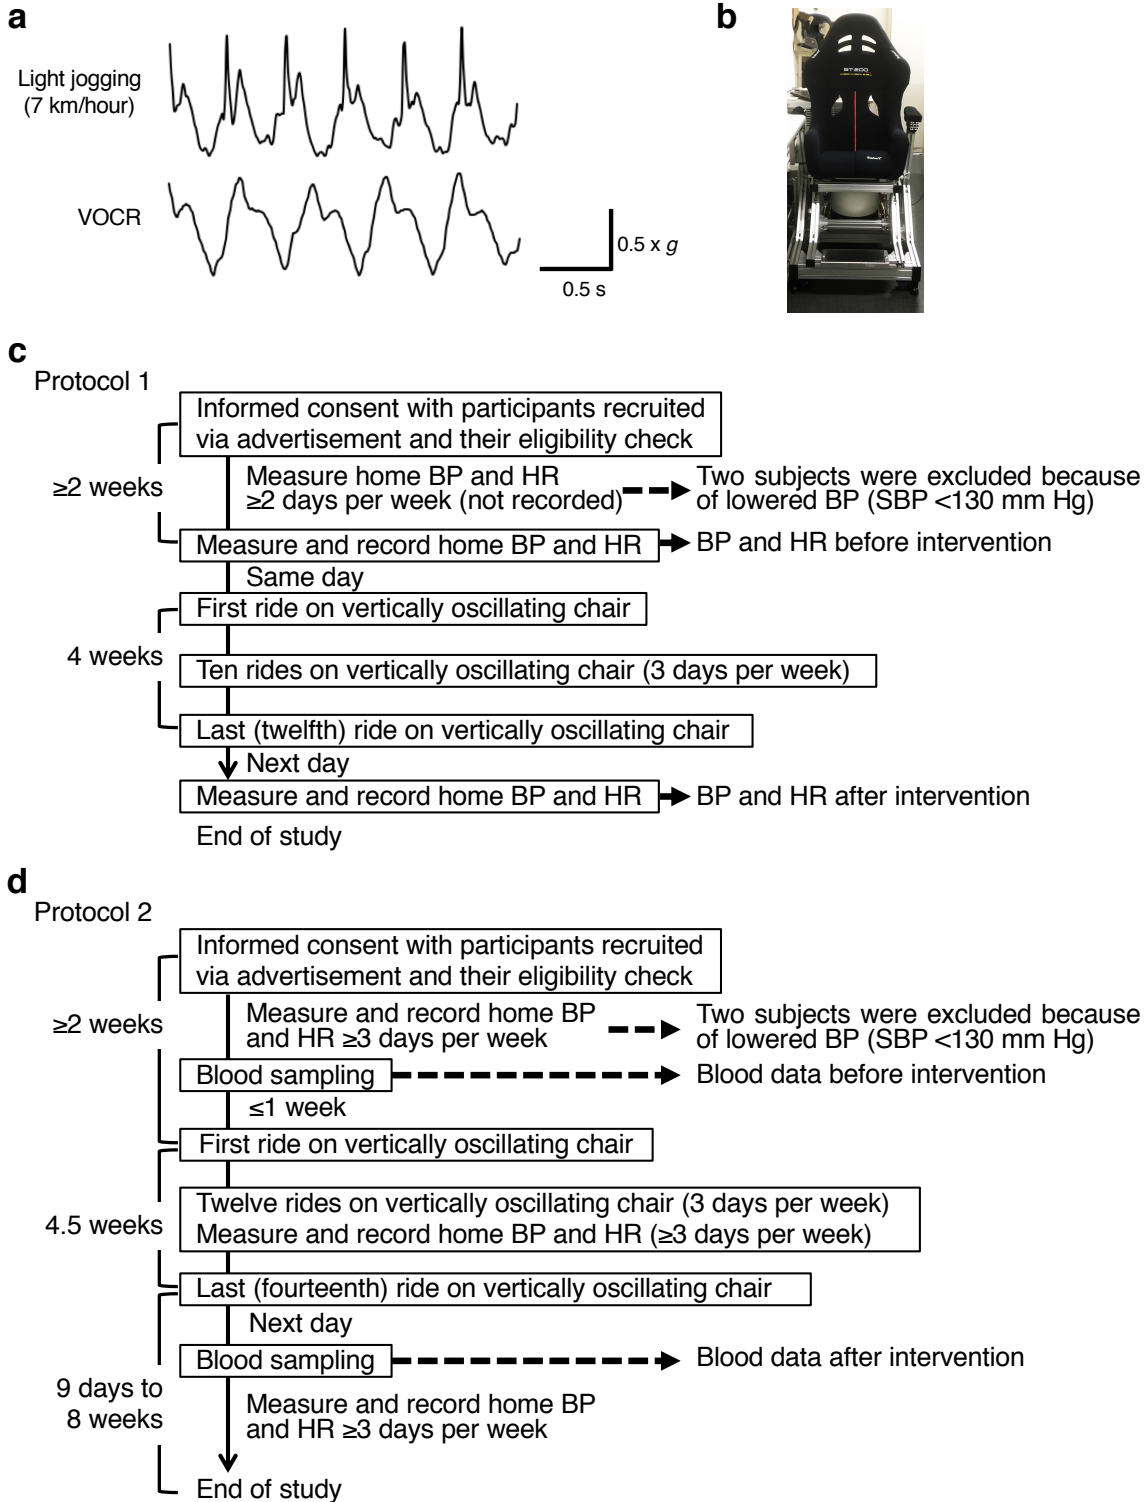

825

826 **Extended Data Fig. 5 | Vertically oscillating chair that reproduces mechanical impacts on the**

827 **head during light jogging, and protocols of clinical study to examine antihypertensive effect of**  
828 **VOCR on hypertensive adult humans. a,** Vertical accelerations generated at adult human head  
829 during light jogging on a treadmill machine (velocity: 7 km/hour) and VOCR (frequency: 2 Hz).  
830 The VOCR system was adjusted to produce  $\sim 1.0 \times g$  vertical acceleration peaks. Right-angled scale  
831 bar,  $0.5 \times g / 0.5 \text{ s}$ . Images are representative of three independent experiments with similar results.  
832 **b,** Photograph of the chair. **c,d,** Protocol 1 (**c**) and 2 (**d**).

Extended Data Fig. 6

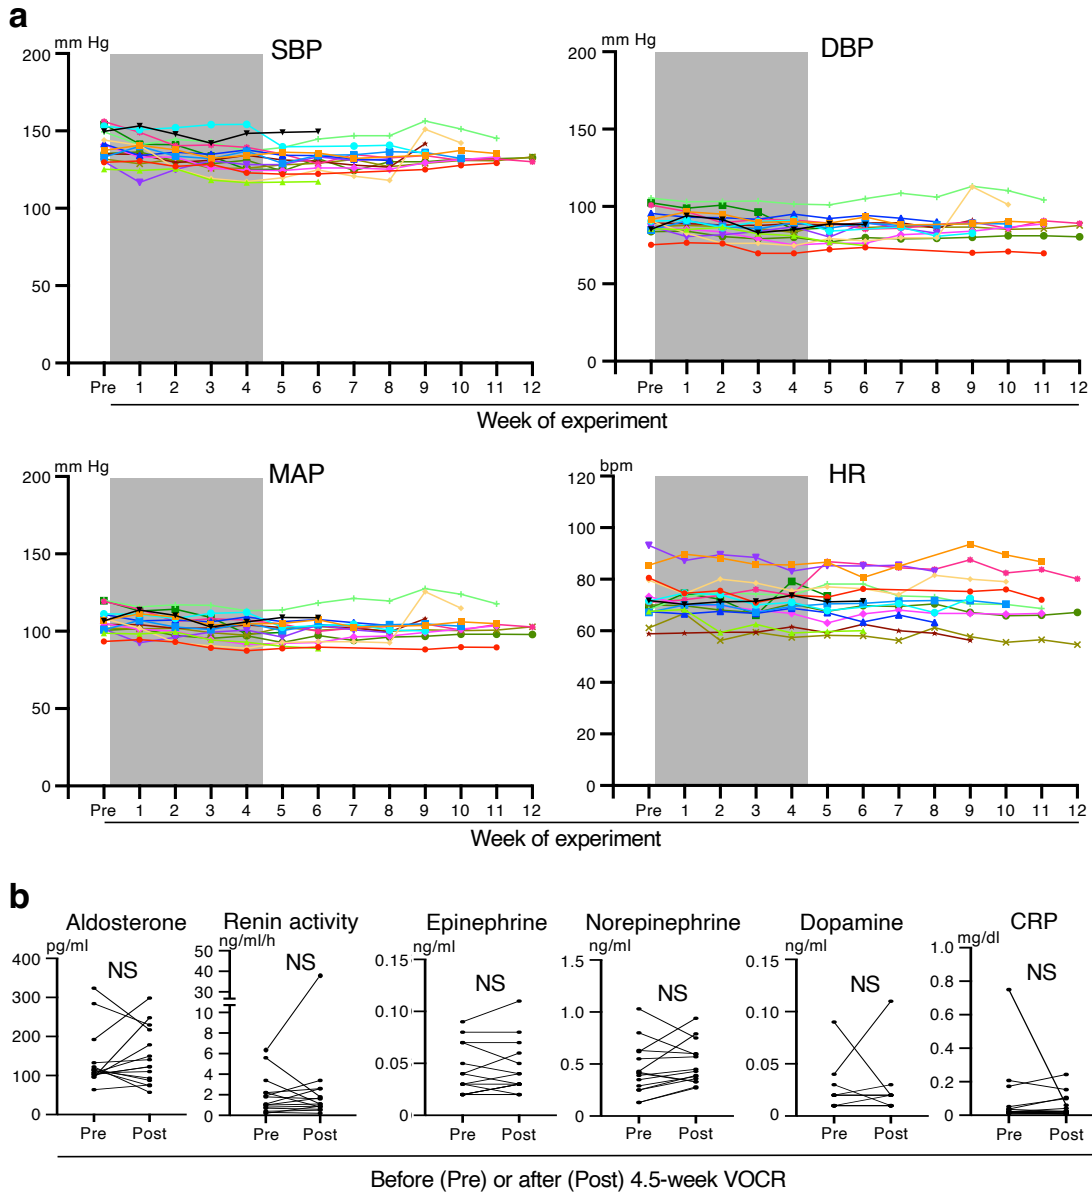

834 **Extended Data Fig. 6 | Trajectories of BP and HR, and blood test values before and after the**  
835 **intervention period in the study of protocol 2. a, Trajectories of “value of the week”s of BP and**  
836 **HR. Gray-shaded rectangles indicate the VOICR intervention periods. The colors and symbols of**  
837 **individual lines correspond to those of individual subjects (Fig. 7c). The black line with inverted**  
838 **triangles indicates subject 9. b, Blood test values before and after the intervention period.**



839 Significant change was not observed in any of tested parameters. NS, not significant; paired two-  
840 tailed Student's *t*-test. (Aldosterone:  $P = 0.6265$ . Renin activity:  $P = 0.3794$ . Epinephrine:  $P =$   
841  $0.5103$ . Norepinephrine:  $P = 0.2653$ . Dopamine:  $P > 0.9999$ . CRP:  $P = 0.4412$ .) A participant  
842 (subject 18) showed a large increase in plasma renin activity after VO<sub>2</sub>CR. We advised him to  
843 consult his primary care physician, who ruled out the disqualifying conditions for this study (e.g.,  
844 severe renal disease; see Methods) based on comprehensive evaluation. Therefore, we did not  
845 exclude subject 18 from our statistical analysis of BP and HR.

Supplementary Table 2

| Subject # | Sex              | Period since diagnosis or self-recognition as hypertension | Smoking | Current medication (dose per day)                                                                         | SBP/DBP (mm Hg) and HR (bpm)                                          |                             |                                                                         |
|-----------|------------------|------------------------------------------------------------|---------|-----------------------------------------------------------------------------------------------------------|-----------------------------------------------------------------------|-----------------------------|-------------------------------------------------------------------------|
|           | Age (years)      |                                                            |         |                                                                                                           | Health problems and diseases other than hypertension                  | Alcohol (if yes, how often) | Habitual exercise just before (left) and after (right) (times per week) |
|           | Body weight (kg) |                                                            |         |                                                                                                           |                                                                       |                             |                                                                         |
|           | Height (cm)      |                                                            |         |                                                                                                           |                                                                       |                             |                                                                         |
|           | BMI              |                                                            |         |                                                                                                           |                                                                       |                             |                                                                         |
| 1         | Male             | 13 years                                                   | No      | Azilsartan · Amlodin (20 mg · 5 mg)<br>Febuxostat (10 mg)<br>Bisoprolol fumarate (5 mg)                   | Walking<br>90 minutes<br>(3 or 4 times)                               | 148/85<br>62                | 139/78<br>66                                                            |
|           | 60               |                                                            |         |                                                                                                           |                                                                       |                             |                                                                         |
|           | 73               |                                                            |         |                                                                                                           |                                                                       |                             |                                                                         |
|           | 165.2<br>27.2    |                                                            |         |                                                                                                           |                                                                       |                             |                                                                         |
| 2         | Female           | 14 years                                                   | No      | None                                                                                                      | Sit-ups 2 x 30 times<br>(every day)                                   | 135/90<br>70                | 127/81<br>69                                                            |
|           | 53               |                                                            |         |                                                                                                           |                                                                       |                             |                                                                         |
|           | 50               |                                                            |         |                                                                                                           |                                                                       |                             |                                                                         |
|           | 159<br>19.8      |                                                            |         |                                                                                                           |                                                                       |                             |                                                                         |
| 3         | Male             | 19 years                                                   | No      | None                                                                                                      | Judo<br>(once)                                                        | 135/86<br>68                | 129/91<br>54                                                            |
|           | 37               |                                                            |         |                                                                                                           |                                                                       |                             |                                                                         |
|           | 113              |                                                            |         |                                                                                                           |                                                                       |                             |                                                                         |
|           | 166<br>32.7      |                                                            |         |                                                                                                           |                                                                       |                             |                                                                         |
| 4         | Female           | 6 years                                                    | No      | None                                                                                                      | None                                                                  | 141/87<br>79                | 132/80<br>80                                                            |
|           | 60               |                                                            |         |                                                                                                           |                                                                       |                             |                                                                         |
|           | 73               |                                                            |         |                                                                                                           |                                                                       |                             |                                                                         |
|           | 156<br>30        |                                                            |         |                                                                                                           |                                                                       |                             |                                                                         |
| 5         | Female           | 1 year                                                     | No      | Azilsartan (20 mg)<br>Amlodin (2.5 mg)                                                                    | None                                                                  | 144/84<br>74                | 140/80<br>69                                                            |
|           | 52               |                                                            |         |                                                                                                           |                                                                       |                             |                                                                         |
|           | 148              |                                                            |         |                                                                                                           |                                                                       |                             |                                                                         |
|           | 22.8             |                                                            |         |                                                                                                           |                                                                       |                             |                                                                         |
| 6         | Female           | 10 years                                                   | No      | None                                                                                                      | None                                                                  | 128/70<br>77                | 109/70<br>76                                                            |
|           | 57               |                                                            |         |                                                                                                           |                                                                       |                             |                                                                         |
|           | 68               |                                                            |         |                                                                                                           |                                                                       |                             |                                                                         |
|           | 164<br>25.3      |                                                            |         |                                                                                                           |                                                                       |                             |                                                                         |
| 7         | Male             | Uncertain (<1 year)                                        | No      | Metformin hydrochloride (1000 mg)<br>Rosuvastatin calcium (5 mg)<br>Sitagliptin phosphate hydrate (50 mg) | Walking<br>120 minutes<br>(once)                                      | 146/100<br>92               | 128/86<br>84                                                            |
|           | 61               |                                                            |         |                                                                                                           |                                                                       |                             |                                                                         |
|           | 67               |                                                            |         |                                                                                                           |                                                                       |                             |                                                                         |
|           | 168<br>23.7      |                                                            |         |                                                                                                           |                                                                       |                             |                                                                         |
| 8         | Male             | 3 months                                                   | Yes     | Montelukast sodium (10 mg)<br>Ebastine (10 mg)                                                            | Walking<br>60 minutes<br>(once)<br>Stretching<br>30 minutes<br>(once) | 135/95<br>61                | 118/78<br>59                                                            |
|           | 46               |                                                            |         |                                                                                                           |                                                                       |                             |                                                                         |
|           | 72               |                                                            |         |                                                                                                           |                                                                       |                             |                                                                         |
|           | 178<br>22.7      |                                                            |         |                                                                                                           |                                                                       |                             |                                                                         |
| 9         | Male             | 7 months                                                   | No      | None                                                                                                      | Karate<br>(2 or 3 times)                                              | 156/89<br>74                | 145/94<br>67                                                            |
|           | 55               |                                                            |         |                                                                                                           |                                                                       |                             |                                                                         |
|           | 87               |                                                            |         |                                                                                                           |                                                                       |                             |                                                                         |
|           | 173<br>29.1      |                                                            |         |                                                                                                           |                                                                       |                             |                                                                         |
| 10        | Male             | 6 months                                                   | No      | None                                                                                                      | Walking<br>40 minutes<br>(4 times)                                    | 140/92<br>81                | 121/79<br>89                                                            |
|           | 70               |                                                            |         |                                                                                                           |                                                                       |                             |                                                                         |
|           | 62               |                                                            |         |                                                                                                           |                                                                       |                             |                                                                         |
|           | 166<br>22.5      |                                                            |         |                                                                                                           |                                                                       |                             |                                                                         |
| 11        | Female           | Uncertain (>1year)                                         | No      | Tamoxifen citrate (20 mg)                                                                                 | None                                                                  | 155/92<br>74                | 136/81<br>67                                                            |
|           | 60               |                                                            |         |                                                                                                           |                                                                       |                             |                                                                         |
|           | 45               |                                                            |         |                                                                                                           |                                                                       |                             |                                                                         |
|           | 157<br>18.3      |                                                            |         |                                                                                                           |                                                                       |                             |                                                                         |
| 12        | Male             | Uncertain (<1 year)                                        | No      | None                                                                                                      | None                                                                  | 133/86<br>70                | 129/88<br>70                                                            |
|           | 68               |                                                            |         |                                                                                                           |                                                                       |                             |                                                                         |
|           | 72               |                                                            |         |                                                                                                           |                                                                       |                             |                                                                         |
|           | 171<br>24.6      |                                                            |         |                                                                                                           |                                                                       |                             |                                                                         |
| 13        | Female           | 7 years                                                    | No      | Telmisartan · Amlodipine<br>(40 mg · 5 mg)                                                                | None                                                                  | 137/95<br>65                | 133/93<br>71                                                            |
|           | 56               |                                                            |         |                                                                                                           |                                                                       |                             |                                                                         |
|           | 58               |                                                            |         |                                                                                                           |                                                                       |                             |                                                                         |
|           | 160<br>22.7      |                                                            |         |                                                                                                           |                                                                       |                             |                                                                         |
| 14        | Male             | Uncertain (<1 year)                                        | No      | Sitagliptin phosphate hydrate (50 mg)<br>Acetazolamide (250 mg)                                           | None                                                                  | 140/90<br>95                | 124/77<br>83                                                            |
|           | 49               |                                                            |         |                                                                                                           |                                                                       |                             |                                                                         |
|           | 69               |                                                            |         |                                                                                                           |                                                                       |                             |                                                                         |
|           | 168<br>24.5      |                                                            |         |                                                                                                           |                                                                       |                             |                                                                         |

846

847

848

| Subject # | Sex<br>Age (years)<br>Body weight (kg)<br>Height (cm)<br>BMI | Period since diagnosis or self-recognition as hypertension<br>Health problems and diseases other than hypertension | Smoking<br>Alcohol (if yes, how often) | Current medication (dose per day)                                                                                                                            | Habitual exercise (times per week)  | SBP/DBP (mm Hg) and HR (bpm) just before (left) and after (right) VOCR period (month of first - last bout of VOCR) |                                                               |                  |
|-----------|--------------------------------------------------------------|--------------------------------------------------------------------------------------------------------------------|----------------------------------------|--------------------------------------------------------------------------------------------------------------------------------------------------------------|-------------------------------------|--------------------------------------------------------------------------------------------------------------------|---------------------------------------------------------------|------------------|
| 15        | Male                                                         | Uncertain (<1 year)                                                                                                | No                                     | None                                                                                                                                                         | None                                | 140/87<br>76                                                                                                       |                                                               |                  |
|           | 43                                                           |                                                                                                                    |                                        |                                                                                                                                                              |                                     |                                                                                                                    | None                                                          |                  |
|           | 69                                                           |                                                                                                                    |                                        |                                                                                                                                                              |                                     |                                                                                                                    |                                                               | Occasionally     |
|           | 165                                                          |                                                                                                                    |                                        |                                                                                                                                                              |                                     |                                                                                                                    |                                                               |                  |
| 25.3      |                                                              |                                                                                                                    |                                        |                                                                                                                                                              |                                     |                                                                                                                    |                                                               |                  |
| 16        | Female                                                       | 15 years                                                                                                           | No                                     | None                                                                                                                                                         | Walking<br>60 minutes<br>(6 times)  | 157/101<br>72                                                                                                      |                                                               |                  |
|           | 48                                                           |                                                                                                                    |                                        |                                                                                                                                                              |                                     |                                                                                                                    | None                                                          |                  |
|           | 45.3                                                         |                                                                                                                    |                                        |                                                                                                                                                              |                                     |                                                                                                                    |                                                               | Occasionally     |
|           | 157.2                                                        |                                                                                                                    |                                        |                                                                                                                                                              |                                     |                                                                                                                    |                                                               |                  |
| 18.3      |                                                              |                                                                                                                    |                                        |                                                                                                                                                              |                                     |                                                                                                                    |                                                               |                  |
| 17        | Male                                                         | 8 years                                                                                                            | Yes                                    | None                                                                                                                                                         | None                                | 140/93<br>59                                                                                                       |                                                               |                  |
|           | 65                                                           |                                                                                                                    |                                        |                                                                                                                                                              |                                     |                                                                                                                    | None                                                          |                  |
|           | 60.1                                                         |                                                                                                                    |                                        |                                                                                                                                                              |                                     |                                                                                                                    |                                                               | Almost every day |
|           | 167.1                                                        |                                                                                                                    |                                        |                                                                                                                                                              |                                     |                                                                                                                    |                                                               |                  |
| 21.5      |                                                              |                                                                                                                    |                                        |                                                                                                                                                              |                                     |                                                                                                                    |                                                               |                  |
| 18        | Male                                                         | 8 years                                                                                                            | No                                     | Azilsartan (20 mg)<br>Lansoprazole (15 mg)<br>Atorvastatin calcium hydrate (10 mg)<br>Benidipine hydrochloride (4 mg)                                        | None                                | 172/123<br>69                                                                                                      |                                                               |                  |
|           | 55                                                           |                                                                                                                    |                                        |                                                                                                                                                              |                                     |                                                                                                                    | Reflex esophagitis<br>Hyperlipidemia                          |                  |
|           | 93.4                                                         |                                                                                                                    |                                        |                                                                                                                                                              |                                     |                                                                                                                    |                                                               | Almost every day |
|           | 168.1                                                        |                                                                                                                    |                                        |                                                                                                                                                              |                                     |                                                                                                                    |                                                               |                  |
| 33.1      |                                                              |                                                                                                                    |                                        |                                                                                                                                                              |                                     |                                                                                                                    |                                                               |                  |
| 19        | Male                                                         | 2 years                                                                                                            | No                                     | None                                                                                                                                                         | Walking<br>60 minutes<br>(3 times)  | 130/83<br>64                                                                                                       |                                                               |                  |
|           | 41                                                           |                                                                                                                    |                                        |                                                                                                                                                              |                                     |                                                                                                                    | None                                                          |                  |
|           | 92.3                                                         |                                                                                                                    |                                        |                                                                                                                                                              |                                     |                                                                                                                    |                                                               | Almost every day |
|           | 183.2                                                        |                                                                                                                    |                                        |                                                                                                                                                              |                                     |                                                                                                                    |                                                               |                  |
| 27.5      |                                                              |                                                                                                                    |                                        |                                                                                                                                                              |                                     |                                                                                                                    |                                                               |                  |
| 20        | Female                                                       | 1 year                                                                                                             | No                                     | Amlodipine besilate (5 mg)<br>Atorvastatin calcium hydrate (10 mg)<br>Limaprost alfadex (15 µg)<br>Loxoprofen sodium hydrate (120 mg)<br>Rebamipide (200 mg) | Swimming<br>40 minutes<br>(5 times) | 136/87<br>70                                                                                                       |                                                               |                  |
|           | 65                                                           |                                                                                                                    |                                        |                                                                                                                                                              |                                     |                                                                                                                    | Hyperlipidemia<br>Lumbar spinal canal stenosis (post-surgery) |                  |
|           | 48.7                                                         |                                                                                                                    |                                        |                                                                                                                                                              |                                     |                                                                                                                    |                                                               | Almost every day |
|           | 158.6                                                        |                                                                                                                    |                                        |                                                                                                                                                              |                                     |                                                                                                                    |                                                               |                  |
| 19.4      |                                                              |                                                                                                                    |                                        |                                                                                                                                                              |                                     |                                                                                                                    |                                                               |                  |
| 21        | Male                                                         | 2 years                                                                                                            | No                                     | None                                                                                                                                                         | None                                | 163/109<br>71                                                                                                      |                                                               |                  |
|           | 32                                                           |                                                                                                                    |                                        |                                                                                                                                                              |                                     |                                                                                                                    | None                                                          |                  |
|           | 65.1                                                         |                                                                                                                    |                                        |                                                                                                                                                              |                                     |                                                                                                                    |                                                               | Almost every day |
|           | 168.9                                                        |                                                                                                                    |                                        |                                                                                                                                                              |                                     |                                                                                                                    |                                                               |                  |
| 22.8      |                                                              |                                                                                                                    |                                        |                                                                                                                                                              |                                     |                                                                                                                    |                                                               |                  |

849

850 **Supplementary Table 2 | Information of subjects who participated in the human studies.**

851 Subjects 1–5 were participants in the study of protocol 1, and subjects 6–21 participated in the  
852 study of protocol 2. Subject 9 was excluded from our statistical analysis because of high serum CRP  
853 value before VOCR (2.85 mg/dL), which made it difficult to rule out acute infection, a possible  
854 disqualifier, at the time of initiation of VOCR, albeit the lack of specific complaint or local  
855 symptom related to acute physical problem(s). His serum CRP after the VOCR period was within  
856 the normal range (0.12 mg/dL).

Extended Data Fig. 7

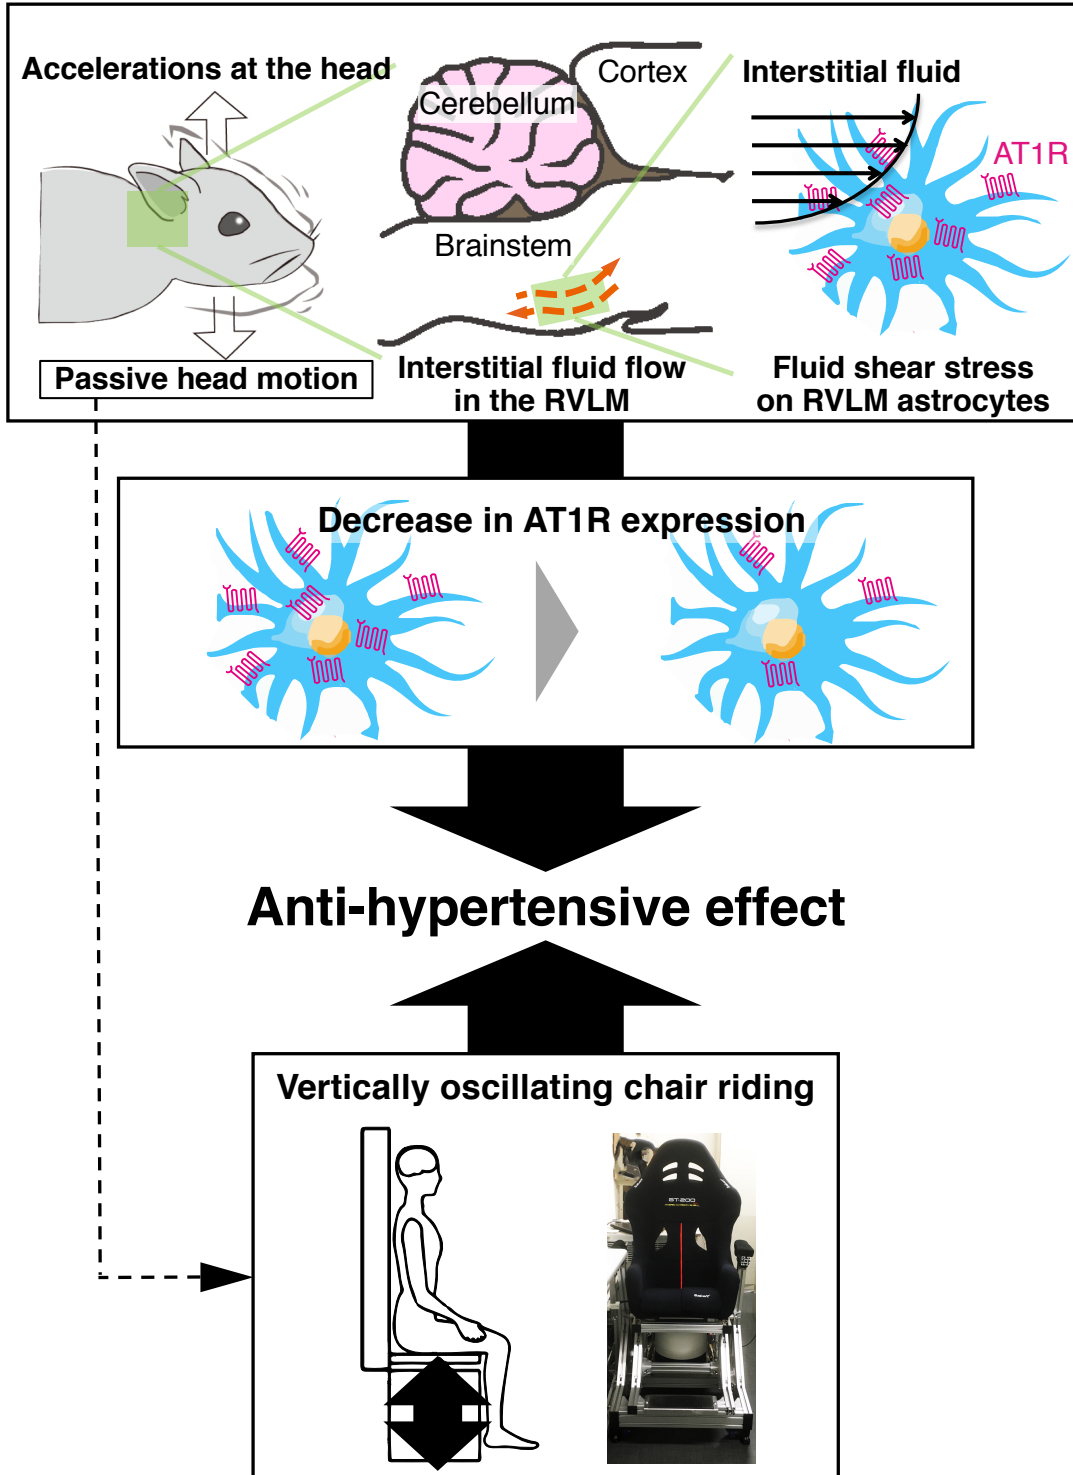

857

858 Extended Data Fig. 7 | Schematic representation of the antihypertensive effects observed in

859 **PHM of hypertensive rats and VOCR of hypertensive humans.** The results from our animal  
860 experiments indicate that cyclical mechanical impact on the head generates interstitial fluid  
861 movement in the RVLM, leading to FSS-induced decrease in AT1R expression in astrocytes in situ,  
862 and thereby ameliorates hypertension. Our studies also show that the VOCR of hypertensive adult  
863 humans, which produces vertical accelerations at their heads, lowers their BP.

864 **Methods**

865 **Animal experiments and human studies.** Animals were housed under a 12/12 hour light-dark  
866 cycle with controlled temperature (23–25°C), and treated with humane care under approval from  
867 the Animal Care and Use Committee of National Rehabilitation Center for Persons with Disabilities  
868 (approval number: 30-07). Male SHRSP/Izm and WKY/Izm rats were provided from the Disease  
869 Model Cooperative Association (Kyoto, Japan) and astrocyte-GFP mice (Aldh1L1-GFP mice)<sup>37</sup>  
870 were obtained from GENSAT (New York, NY), acclimated to the laboratory environments for at  
871 least 1 week, randomly divided into experimental groups, and used for experiments.

872 All participants in our human studies provided written informed consent. The studies were  
873 approved by the Ethics Committees of the Iwai Medical Foundation and the National Rehabilitation  
874 Center for Persons with Disabilities (approval number: 30-01).

875

876 **Chemicals and antibodies.** All the chemicals were purchased from Sigma-Aldrich unless noted  
877 otherwise. Primary antibodies and their dilution rates used in this study are as follows: mouse  
878 monoclonal anti-GFAP (MAB360; Millipore, Billerica, MA) at 1:1,000; rabbit polyclonal anti-  
879 GFAP (Z0334; Dako, Glostrup, Denmark) at 1:1,000; chicken polyclonal anti-GFAP (ab4674;  
880 Abcam, Cambridge, UK) at 1:2,000; rabbit polyclonal anti-cleaved caspase-3 (9661; Cell Signaling  
881 Technology, Danvers, MA) at 1:1,000; mouse monoclonal anti-NeuN (MAB377; Millipore) at

882 1:200; rabbit polyclonal anti-NeuN (ABN78; Millipore) at 1:1,000, rabbit polyclonal anti-AT1R  
883 (HPA003596; Sigma-Aldrich, St. Louis, MO) at 1:200; rabbit polyclonal anti-AGTRAP  
884 (HPA044120; Sigma-Aldrich) at 1:1000; rabbit polyclonal anti-GFP (598; MBL, Nagoya, Japan) at  
885 1:2,000; chicken polyclonal anti-GFP (ab13970; Abcam) at 1:2,000; mouse monoclonal anti-TUJ-1  
886 (ab78078; Abcam) at 1:1000. Secondary antibodies conjugated with Alexa Fluor 350, 488, 568,  
887 633, and 647 (Thermo Fisher Scientific, Waltham, MA) were used at the dilution rate of 1:400. Cell  
888 nuclei were stained with DAPI (D9542; Sigma-Aldrich).

889

890 **PHM application to rats.** Rats were subjected to PHM in a prone position using a platform that we  
891 developed to move their heads up and down<sup>24</sup> (schematically represented in Fig. 1a). During PHM,  
892 animals were kept anesthetized with 1.5% isoflurane except for the  $\mu$ CT study, in which we used  
893 intraperitoneal injection of 2 mg/kg of midazolam (Sandoz, Basel, Switzerland), 2.5 mg/kg of  
894 butorphanol (Meiji Seika, Tokyo, Japan) and 0.15 mg/kg of medetomidine (Kyoritsu Seiyaku,  
895 Tokyo, Japan) for anesthesia. Body temperature of tested animals was maintained using a light  
896 heater. The PHM system was set up to reproduce the head motion (5 mm, 2 Hz) of treadmill  
897 running (20 m/minute) which made 1.0 x g vertical acceleration peaks at the head of rats  
898 examined<sup>24</sup>. The control rats in PHM experiments were anesthetized likewise, and placed in a prone  
899 position with their heads on the platform that was left static.

900

901 **Treadmill running of rats.** Rats were subjected to compulsive running using a belt drive treadmill  
902 equipped with an electrical shock system (MK-680S; Muromachi, Tokyo, Japan). We habituated the  
903 rats to the treadmill system by placing them in the machine several times without turning on the  
904 treadmill belt during the acclimation period. The electrical stimulation was turned on only once or  
905 twice during the first 5 minutes of the 30-minute treadmill running on the first day of the 4-week  
906 treadmill running period. Thereafter, we did not need to turn on the electrical shock system to have  
907 the animals keep running, perhaps because the velocities we employed (20 m/minute) were  
908 moderate. The control rats in treadmill running experiments were placed on the belt daily for 30  
909 minutes without turning on the treadmill.

910

911 **Measurement of BP and HR of rats by radio-telemetry.** Rats were implanted with a telemetry  
912 pressure probe (Millar, Houston, TX) in the abdominal aorta at 9–10 weeks of age, following the  
913 surgical procedure described previously<sup>61</sup>. Rats were allowed to recover for at least 14 days before  
914 the initiation of experimental interventions or analyses. During the periods of experimentation that  
915 involved repeated BP and HR measurements over multiple weeks, BP and HR were monitored and  
916 recorded for continuous 30 minutes every 7 days between 10:00 AM and 12:00 PM (noon) by a  
917 multichannel amplifier and signal converter (LabChart 8; ADInstruments, Dunedin, New Zealand).



918 Mean arterial pressure (MAP) was calculated with a standard formula as follows:  $MAP = \text{diastolic BP (DBP)} + 1/3 [\text{systolic BP (SBP)} - \text{DBP}]$ .

920

921 **Measurement of urinary norepinephrine excretion of rats.** Urine excreted during the indicated  
922 24-hour period was collected by means of a metabolic cage (KN-646; Natsume Seisakusho, Tokyo,  
923 Japan), and stored at  $-80^{\circ}\text{C}$  until assayed. Excretion of urinary norepinephrine was calculated by  
924 multiplying its concentration measured using an enzyme-linked immunosorbent assay (ELISA) kit  
925 (KA1891; Abnova, Taipei, Taiwan) with the urine volume.

926

927 **Microinjection into rat RVLM.** Rats were anesthetized with intraperitoneal injection of  
928 midazolam, butorphanol, and medetomidine except for Ang II or valsartan injection studies, in  
929 which we used 1.2–1.4 g/kg of urethane (Sigma-Aldrich), and subjected to microinjection as  
930 described previously<sup>62</sup>. In brief, a 25s-G microsyringe (Hamilton, Bonaduz, Switzerland) was  
931 stereotaxically positioned on anesthetized rats after exposure of dorsal surface of medulla. The  
932 needle placement was defined according to an atlas of the rat with stereotaxic coordinates<sup>63</sup>;  
933 anteroposterior angle:  $18^{\circ}$ , 1.8 mm lateral to the calamus scriptorius, 3.5 mm ventral to the dorsal  
934 surface of the medulla. The placement of the needle tip in RVLM was confirmed by ensuring the  
935 pressure response to a test-dose injection of L-glutamate<sup>12,64</sup> (100 nL of 1 mmol/L in PBS).

936 Microinjection of various compounds or mediums was made through a needle reinserted at the  
937 same coordinates with fixed infusion rates using a microsyringe pump instrument (KD scientific,  
938 Holliston, MA). Except for experiments to analyze pressor or depressor responses, we held the  
939 syringe for 5 minutes after the injection to avoid reflux, pulled out the needle carefully, and sutured  
940 the skin. The volumes and rates of microinjection were as follows; Ang II (Auspep, Tullamarine,  
941 Australia) and valsartan (Tocris Bioscience, Bristol, UK): 100 nL of 1 mmol/L in PBS at 0.1  
942  $\mu\text{L}/\text{minute}$ , AAV solutions: 300 nL at 0.03  $\mu\text{L}/\text{minute}$ , PEG solutions: 1  $\mu\text{L}$  at 0.1  $\mu\text{L}/\text{minute}$ ,  
943 Isovist: 1  $\mu\text{L}$  at 0.2  $\mu\text{L}/\text{minute}$ .

944

945 **Analysis of pressor/depressor responses.** Rats implanted with a telemetry pressure probe were  
946 anesthetized with urethane, and subjected to the analysis of pressor/depressor responses. Monitoring  
947 the BP, we injected Ang II or valsartan (100 pmol) stereotaxically into the unilateral RVLM  
948 following the microinjection procedures described above. The injection side (right or left) was  
949 chosen randomly. When both pressor and depressor responses were analyzed, at least 2 hours  
950 elapsed between the injections of Ang II and valsartan (Fig. 2a). The maximal MAP change elicited  
951 from the baseline was statistically analyzed<sup>14</sup>.

952

953 **Production of AAV vectors.** To obtain astrocyte- and neuron-specific transduction, we used AAV9

954 vectors that expressed a transgene under the control of mouse GFAP and rat NSE promoters,  
955 respectively. The astrocyte-specific GFAP promoter consists of 0.6-kb hybrid fragments containing  
956 ABC1D genomic regions upstream of the mouse *GFAP* gene<sup>65</sup>. The neuron-specific NSE promoter  
957 is composed of the 1.2-kb genomic region upstream of the rat *NSE* gene<sup>66</sup>. Full-length rat AGTRAP  
958 cDNA was synthesized (Eurofins Genomics, Tokyo, Japan) and inserted into plasmid pAAV-GFAP-  
959 GFP-P2A-Cre-woodchuck hepatitis virus post-transcriptional regulatory element (WPRE)-simian  
960 virus 40 polyadenylation signal (SV40pA) and pAAV-NSE-GFP-P2A-Cre-WPRE-SV40pA to  
961 generate pAAV-GFAP-GFP-P2A-AGTRAP-WPRE-SV40pA and pAAV-NSE-GFP-P2A-  
962 AGTRAP-WPRE-SV40pA. pAAV-GFAP-GFP-WPRE-SV40pA and pAAV-NSE-GFP-WPRE-  
963 SV40pA were used for experimental controls. Recombinant single-strand AAV2/9 vectors were  
964 produced by transfection of HEK293T cells (Thermo Fisher Scientific) with the respective pAAV  
965 expression plasmid, pAAV2/9 and a helper plasmid (Stratagene, La Jolla, CA) as previously  
966 described<sup>67</sup>. After harvesting conditioned medium, the viral particles were precipitated using  
967 polyethylene glycol 8000 and iodixanol continuous gradient centrifugation as previously  
968 described<sup>68</sup>. The genomic titer of purified AAV9 vectors was determined by qPCR that targeted the  
969 WPRE sequence.

970

971 **Measurement of pressure in rat RVLm.** Intra-brainstem pressure (IBP) was measured using a

972 blood pressure telemeter by means of the procedure we previously reported<sup>24,69</sup>. The pressure sensor  
973 was placed in rat RVLM using the same approach with the microinjection described above. During  
974 IBP measurement, respiration was monitored using a respiration sensor attached to the tested rats.  
975 Low-pass (50 Hz) filtered IBP waves were analyzed using LabChart 8 software (ADInstruments).  
976 We observed ~0.5-Hz respiration-synchronized IBP changes with ~2.5 mm Hg magnitude (peak to  
977 peak) as well as 2-Hz PHM-specific waves with ~1.2 mm Hg magnitude (peak to peak).

978

979 **In vivo analysis of the distribution dynamics of interstitial fluid in rat RVLM using  $\mu$ CT.**

980 Isovist (Bayer, Berlin, Germany) was stereotaxically microinjected into RVLM of anesthetized 12-  
981 week-old male WKY rats following the procedure described above, and visualized using  $\mu$ CT  
982 (inspeXio SMX-100CT, Shimadzu, Kyoto, Japan). After Isovist injection, rats were subjected to  
983 two serial brain  $\mu$ CT scans between which PHM was either applied or left unapplied (kept  
984 sedentary) for 30 minutes (Fig. 4e).  $\mu$ CT images were analyzed using software for 3D morphometry  
985 (TRI/3D-BON-FCS64, RATO System, Tokyo, Japan). Voxels with  $\geq 1.02$  times signal intensity as  
986 compared with that of air was defined as Isovist cluster in rat RVLM.

987

988 **Simulative calculation of the magnitude of FSS on the cells in rat RVLM during PHM.** We

989 calculated interstitial fluid flow-derived FSS imposed on cells in rat RVLM by referring the results

990 from our  $\mu$ CT analysis (Fig. 4g,h) to the Henry Darcy's law, which defines the flux density of  
991 penetrating fluid per unit time<sup>70</sup>). The velocity of interstitial fluid flow ( $u$ ) is assumed to approach  
992 the superficial velocity ( $u_\infty$ ) and zero ( $u=0$ ) at the cell surface (i.e., a no-slip condition). Using these  
993 two boundary conditions together with the Brinkman equation, FSS ( $\tau$ ) at the interstitial cell surface  
994 can be obtained as described in Supplementary Table 1<sup>60</sup>.

995

996 **Cell culture.** Primary cultures of astrocytes were prepared from the cortex of neonatal (2–3 days  
997 old) astrocyte-GFP mouse<sup>37</sup> pups by physical dissociation as previously described<sup>71</sup>. Cells were  
998 maintained in DMEM/F12 supplemented with 10% FBS (GE Healthcare Life Science,  
999 Marlborough, MA), 100 I. U./mL penicillin and 100  $\mu$ g/mL streptomycin at 37°C in a humidified  
1000 incubator (5% CO<sub>2</sub> and 95% air). Culture medium was replaced with fresh one every 3–4 days until  
1001 confluent. Astrocytes were detached with trypsin/EDTA (0.05% trypsin, 0.53 mM EDTA in PBS),  
1002 replated at a ratio of 1:10, and grown to approximately 80–90% confluence prior to use.

1003 Mouse neuroblastoma-derived Neuro2A cells (provided from Dr. Yokota, Tokyo Medical and  
1004 Dental University, Japan), which exhibit neuronal phenotypes and morphology<sup>39,40</sup>, were cultured in  
1005 DMEM (Wako, Japan) supplemented with 10% FBS, 100 I. U./mL penicillin and 100  $\mu$ g/mL  
1006 streptomycin at 37°C in a 5% CO<sub>2</sub> incubator.

1007

1008 **Application of FSS to astrocytes or Neuro2A cells in culture.** Astrocytes or Neuro2A cells grown  
1009 in a poly-D-lysine-coated 35-mm culture dish (Corning Life Sciences, Corning, NY) were exposed  
1010 to pulsatile FSS (average 0.7 Pa) for 30 minutes. As we previously reported<sup>23,24,35</sup>, a parallel plate  
1011 flow-chamber and a roller pump (Masterflex; Cole-Parmer, Vernon Hills, IL) were used to apply  
1012 FSS. The flow-chamber, which was composed of a cell culture dish, a polycarbonate I/O unit, and a  
1013 silicone gasket, generated a 23-mm-long 10-mm-wide 0.5-mm-high flow channel. To maintain pH  
1014 and temperature of culture medium, we used a 5% CO<sub>2</sub>-containing reservoir and a temperature-  
1015 controlled bath.

1016  
1017 **Tissue preparation and immunostaining (immunohistochemical or immunocytochemical**  
1018 **analysis).** Rats were anesthetized with intraperitoneal injection of midazolam, butorphanol, and  
1019 medetomidine, and perfused transcardially with 4% paraformaldehyde (PFA; TAAB Laboratories  
1020 Equipment, Aldermaston, UK). The brainstems were excised and post-fixed with 4% PFA in PBS  
1021 overnight at 4°C. The tissues were cryoprotected by soaking in 20% sucrose/PBS for 24 hours and  
1022 in 30% sucrose/PBS for additional 24 hours at 4°C. Fixed brainstems were frozen in optimal cutting  
1023 temperature (OCT) compound (Sakura Finetek, Tokyo, Japan) and cut into 16 µm-thick coronal  
1024 sections using a cryostat (CM3050S; Leica Microsystems, Wetzlar, Germany). Sliced sections were  
1025 permeabilized and blocked with 0.1% Tween-20 and 4% donkey serum (Merck Millipore,

1026 Burlington, MA) in Tris-buffered saline, blocked with, and stained by incubating with primary  
1027 antibodies at appropriate dilutions followed by their species-matched secondary antibodies. Cell  
1028 nuclei were stained with DAPI (Sigma-Aldrich). The slides were mounted with ProLong Gold  
1029 Antifade Reagent (Thermo Fisher Scientific) and images were captured with a BZ-9000 digital  
1030 microscope system (Keyence, Osaka, Japan).

1031 For immunocytochemistry, cultured cells were fixed with 4% PFA in PBS for 20 minutes at  
1032 room temperature (RT) and permeabilized and blocked with 0.1% Triton X-100 and 10% FBS  
1033 (Thermo Fisher Scientific) in PBS for 30 minutes at RT. The cells were then incubated with primary  
1034 antibodies for 2 hours and then with secondary antibodies for 1 hour at RT.

1035

1036 **Quantitative PCR Analysis (reverse transcription and real-time PCR).** 500 ng of total RNA  
1037 extracted from cell culture were subjected to reverse transcription, using ISOGEN II (NIPPON  
1038 GENE, Tokyo, Japan) and PrimeScript RT reagent Kit (TaKaRa, Kusatsu, Japan). The resulting  
1039 cDNA was subjected to real-time PCR analysis using glyceraldehyde-3-phosphate dehydrogenase  
1040 (GAPDH) as an internal control in Applied Biosystems 7500 Real Time PCR System with Power  
1041 SYBR Green PCR Master Mix (Thermo Fisher Scientific).

1042 The primers (sense and antisense, respectively) were as follows: mouse *Agtr1a* (AT1R-encoding  
1043 gene); 5'-AAAGGCCAAGTCGCACTCAAG-3'

1044 and 5'-TCCACCTCAGAACAAGACGCA-3',  
1045 mouse *Gapdh* (GAPDH-encoding gene); 5'-GCAAAGTGGAGATTGTTGCCAT-3' and  
1046 5'-CCTTGACTGTGCCGTTGAATTT-3', WPRE (for genomic titration of purified AAV9 vectors);  
1047 5'-CTGTTGGGCACTGACAATTC-3' and 5'-GAAGGGACGTAGCAGAAGGA-3'.

1048

1049 **Fluorescent Ang II binding assay.** Six or twenty-four hours after the termination of FSS  
1050 application, cultured astrocytes were incubated with Ang II type 2 receptor inhibitor, PD123319  
1051 ( $10^{-6}$  mol/L in PBS; ab144564, Abcam), for 20 minutes, and then with tetramethylrhodamine  
1052 (TAMRA)-labeled Ang II ( $10^{-8}$  mol/L in PBS; AS-61181, AnaSpec, Fremont, CA) for 30 minutes.  
1053 After 3 times wash with PBS, samples were fixed and subjected to anti-GFP immunostaining to  
1054 strengthen the GFP-derived green fluorescence signals and corroborate our analysis on astrocytes  
1055 prepared from astrocyte-GFP mice as well as to secure the binding of fluorescent Ang II. Green and  
1056 red fluorescence was viewed with a fluorescence microscope (BZ-9000 HS, Keyence). Samples  
1057 from astrocytes left unexposed to FSS were prepared and viewed likewise, and provided an  
1058 experimental control.

1059

1060 **Hindrance of interstitial fluid movement (flow) by introduction of hydrogel in rat RVLM.** Just  
1061 before use, a pre-mixture of polyethylene glycol (PEG) with functional groups (25 g/L in PBS) was



1062 prepared from tetra-armed thiol-terminal (TetraPEG-SH) (Yuka-Sangyo, Tokyo, Japan) and  
1063 acrylate-terminal (Tetra-PEG-ACR) (JenKem Technology, TX, USA) PEG solutions as we  
1064 previously described<sup>24</sup>. Tetra-armed polyethylene glycol without functional groups (25 g/L in PBS)  
1065 was used as an ungelatable control. For the analysis of hydrogel distribution in rat RVLM, we used  
1066 Tetra-PEG-SH fluorescently labeled with a thiol-reactive probe (Merck KGaA, Darmstadt,  
1067 Germany). Microinjection of PEG solutions into rat RVLM was conducted as described above.

1068 To specifically analyze the consequences of PHM and hydrogel introduction by minimizing  
1069 possible invasive influences of microinjection itself, we gave 1-week recovery time before the first  
1070 BP measurement, and then applied PHM to the rats (daily 30 minutes, 14 or 28 days). Immediately  
1071 subsequent to post-PHM 24-hour urine collection (Fig. 6a), rats were sacrificed by transcardial  
1072 infusion of PFA and subjected to histological analysis.

1073

1074 **Terminal deoxynucleotidyl transferase-mediated dUTP nick-end labeling (TUNEL) assay.** Rat  
1075 RVLM sections were stained using a TUNEL kit (Biotium, Fremont, CA) according to the  
1076 manufacturer's protocols, counterstained with DAPI, and then viewed using a 20x objective with a  
1077 fluorescence microscope (BZ-9000 HS, Keyence). The nuclei of apoptotic cells were determined by  
1078 the existence of green fluorescent patches, and cell apoptosis was quantified by referring their  
1079 counts to total numbers of nuclei defined by DAPI staining.

1080

1081 **Measurement of accelerations at human head.** To measure the accelerations at the human head  
1082 during treadmill running or VO<sub>2</sub>CR, we fixed an accelerometer (NinjaScan-Light; Switchscience,  
1083 Tokyo, Japan) on foreheads with a surgical tape. Vertical acceleration was evaluated using the  
1084 software application provided from the manufacture.

1085

1086 **Blood sampling and measurement of parameters in plasma and serum of humans.** Blood  
1087 sampling in the human study of protocol 2 was conducted between 12 PM and 3 PM. Participants  
1088 were rested in a sitting position for at least 10 minutes before starting the sampling procedures.  
1089 After plasma (for catecholamines and renin activity) and serum (for aldosterone and CRP) separation  
1090 by centrifugation, we outsourced the measurement of parameters be tested (BML, Kawagoe, Japan).

1091

1092 **Design and participants of clinical study on antihypertensive effects of vertically oscillating**  
1093 **chair riding.** We conducted single-arm clinical studies. The study of protocol 1 (Extended Data  
1094 Fig. 5c) was carried out at the affiliated health services facility of Iwai Medical Foundation (Iwai  
1095 Keiaien, Tokyo, Japan). The study of protocol 2 (Extended Data Fig. 5d) was carried out at the  
1096 National Rehabilitation Center for Persons with Disabilities Hospital.

1097 Subjects were considered eligible if they were 20–75 years old of age and confirmed to have

1098 130–160 mm Hg of SBP at the time of interview for informed consent and eligibility check.

1099 Subjects with mental or psychological illnesses, history or presence of cardiovascular events,

1100 history or presence of severe dysfunction/disorder of liver, kidney, lung, gastrointestinal tract, and

1101 spine, or presence of acute injuries/diseases (e.g., recent traumas and infectious diseases) were

1102 excluded with the exception of those who were given permission for participating in this study from

1103 their primary care physicians. Whereas antihypertensive medication did not disqualify the subjects

1104 (Supplementary Table 2), they were advised not to change their medication from at least one month

1105 prior to the first bout of VOCCR through the study period (i.e., up to 8 weeks after the last bout of

1106 VOCCR). At a certain (approximately fixed) time point in the morning (typically just before

1107 breakfast), they conducted 3 consecutive measurements of BP (mm Hg) and HR (bpm) using an

1108 automated upper arm-cuff sphygmomanometer, and recorded the values from all those

1109 measurements. These procedures of BP measurement and recording accord with the Japanese

1110 Society of Hypertension Guidelines for the management of hypertension (JSH2019)<sup>72</sup>. Subjects

1111 were directed to start periodical ( $\geq 3$  days per week) BP/HR measurements at least 2 weeks before

1112 the initiation of the intervention (i.e., daily VOCCR) and continue to measure BP/HR throughout the

1113 study period using the same sphygmomanometers. Particularly at the study of protocol 2 (i.e., the

1114 study at the National Rehabilitation Center for Persons with Disabilities), participants were advised

1115 to record all the data of those measurements. Those whose BP lowered below the eligibility

1116 requirement of the study ( $\geq 130$  mm Hg of SBP) prior to the initiation of VOCCR intervention were  
1117 eliminated from the study. Participants were directed to be rested and keep calm for at least 1  
1118 minute before starting to measure BP/HR. The mean BP/HR value from 3-time measurements was  
1119 defined as “value of the day”, and used for statistical analysis. When BP and HR were measured  
1120 and recorded on  $\geq 3$  days during a particular week in the study of protocol 2, the mean of all the  
1121 “value of the day”s through the week was defined as “value of the week”. For the participants who  
1122 agreed, periodical BP/HR measurement and recording ( $\geq 3$  days per week) was extended up to 8  
1123 weeks after the last bout of VOCCR.

1124

1125 **Statistical analysis.** All the quantitative data are presented as mean  $\pm$  s.e.m. Parametric statistical  
1126 analyses were conducted by paired or unpaired two-tailed Student’s *t*-test for two-group  
1127 comparison, and ANOVA with Tukey’s post hoc test for multiple ( $\geq 3$ ) group comparison, using  
1128 Prism software (Version 8, GraphPad Software, San Diego, CA). Differences were considered as  
1129 significant at *P* values below 0.05.
